# Supplementary material
Source: publisher figshare collection journal article supplement (https://geolsoc.figshare.com/ndownloader/files/8500805)
Supplement: Supplementary file 1 [file 8500805]

## Sheet: Sheet1
Supplementary data
List of experimental conditions and results of permeability measurements on Whitby Mudstone.
Sample RA1
Downstream volume = 795 mm3
Pore pressure oscillation method
Confining Pressure (MPa)	Pore Pressure (MPa)	Effective Pressure (Pc-Pp) (MPa)	Wave amplitude (MPa)	Wave period (s)	Gain (A)	Phase (θ)	Permeability × 10-20 (m2)	Error in Permeability × 10-20 (m2)	Permeability when ξ=0 (k0) × 10-20 (m2)	Error in k0 × 10-20 (m2)	log10 Storativity (β) (Pa-1)	log10 error in (β) (Pa-1)	Dimensionless Permeability (η)	Error in (η)	log10 dimensionless Storativity (ξ)	log10 error in (ξ)	Porosity From Storativity	Error Porosity From Storativity
53.4828	24.6016	28.8812	0.2	100	0.822066	0.614229	307.797	324	322.259	79.2828	-1.92846	-8.12627	2.75794	2.5849	-3.39193	0.359952
60.9578	24.6015	36.3563	0.2	100	0.600114	0.992524	187.522	106.098	167.456	48.2418	1.00461	-8.28677	1.68024	0.84595	-0.458862	0.199443
60.5968	24.6014	35.9954	0.2	200	0.768861	0.653795	134.199	12.7348	134.199	20.4276	-8.53653	-9.17806	2.40488	0.197055	-10	-0.691842	0.0803053	0.0183322
74.4292	24.6012	49.828	0.2	200	0.312506	1.20136	36.7164	0.994647	36.7164	8.75176	-8.53653	-9.93624	0.657966	0.00815046	-10	-1.45002	0.0803053	0.00319914
95.6116	24.6015	71.01	0.2	500	0.109027	1.36523	4.89635	0.113825	4.89635	1.54493	-12.5195	-18.8386	0.219362	3.41303e-11	-13.983	-10.3524	8.35188e-06	4.00566e-12
94.7534	24.6013	70.152	0.4	1000	0.157575	1.38173	3.57573	0.109159	3.56174	0.559363	-12.8973	-10.8363	0.32039	0.00564614	-14.3608	-2.35007	3.4994e-06	0.000402703
85.9187	24.6014	61.3173	0.4	1000	0.166206	1.35567	3.76222	0.0874596	3.76222	0.575336	-8.53653	-18.8136	0.337101	6.02277e-11	-10	-10.3278	0.0803053	4.24328e-12
36.5666	24.6012	11.9654	0.2	500	0.359747	1.19899	16.8387	0.898079	17.2123	2.99466	-2.36909	-9.75453	0.754383	0.0322502	-3.83256	-1.26832
51.8793	24.6014	27.2779	0.2	500	0.179792	1.36412	8.15927	0.2197	8.15927	2.00649	-8.53653	-10.1161	0.365542	0.00442342	-10	-1.62985	0.0803053	0.0021145
73.8003	24.6012	49.1991	0.4	1000	0.208961	1.31737	4.76954	0.110876	4.76954	0.650929	-13.0763	-18.814	0.427356	2.67839e-11	-14.5398	-10.3278	2.31734e-06	4.23929e-12
95.1154	24.6018	70.5136	0.4	1000	0.12141	1.40685	2.73015	0.0634678	2.73015	0.48837	-8.53654	-18.9217	0.24463	2.77167e-11	-10	-10.4361	0.0803053	3.30838e-12
76.7825	24.6014	52.1811	0.4	1000	0.14322	1.35697	3.23012	0.07509	3.23012	0.532089	-12.6847	-18.873	0.289424	2.61085e-11	-14.1481	-10.3868	5.70978e-06	3.70033e-12
55.7792	24.6013	31.1778	0.4	1000	0.207539	1.34933	4.73561	0.111739	4.73561	0.648353	-8.53653	-11.4437	0.424317	0.00152714	-10	-2.95751	0.0803053	9.94378e-05
35.6475	24.6014	11.0462	0.4	1000	0.539095	0.903465	14.5482	0.339089	14.287	1.21712	-12.9451	-10.7998	1.30354	0.00195785	-14.4086	-2.31355	3.13442e-06	0.000438031
35.713	24.6013	11.1117	0.4	1000	0.53362	0.917585	14.4428	0.338976	14.0838	1.20582	-0.311129	-10.5562	1.29409	0.00372376	-1.7746	-2.07031
51.8412	24.6013	27.2399	0.4	1000	0.331449	1.16431	7.84157	0.182291	7.84157	0.850667	-8.53653	-18.8381	0.702615	2.81918e-11	-10	-10.3524	0.0803053	4.01002e-12
73.2155	24.6013	48.6141	0.4	1000	0.176392	1.37211	4.01673	0.0966724	3.99997	0.593971	-2.47301	-11.2595	0.359905	0.00199728	-3.93648	-2.77327
97.4328	24.6012	72.8316	0.4	1000	0.0683914	1.39022	1.53016	0.0355712	1.53016	0.438135	-8.53652	-18.8381	0.137104	1.0901e-10	-10	-10.3524	0.0803053	4.01004e-12
70.4316	24.6014	45.8302	0.4	1000	0.0795091	1.47599	2.22544	0.055458	2.22544	0.469117			0.159523	0.00127541
70.3984	24.6015	45.7969	0.5	800	0.0782207	1.47545	2.18916	0.050891	2.18916	0.46527	-8.53653	-18.8136	0.156922	7.45063e-09	-10	-10.3278	0.0803053	4.24333e-12
70.4831	24.6016	45.8815	0.5	800	0.0764761	1.48832	2.14056	0.0534722	2.14056	0.460118	-12.7917	-10.9908	0.153402	0.00124919	-14.2552	-2.50454	4.46234e-06	0.000282173
34.648	24.6018	10.0462	0.5	800	0.350775	1.1152	10.8699	0.255203	10.4824	1.05576	-12.5791	-10.7191	0.77684	0.00227308	-14.0425	-2.23284	7.2816e-06	0.000527497
29.3545	24.6014	4.75306	0.5	800	0.847149	0.443548	61.2648	9.12063	44.4834	2.89195	-0.441374	-9.07655	4.39155	0.575118	-1.90484	-0.590334	9.99769e+06	0.0231592
51.3462	24.6015	26.7447	0.5	800	0.282339	1.29514	8.26353	0.223179	8.21168	0.920803	-0.261323	-10.0965	0.592343	0.00725257	-1.72479	-1.61036	1.5134e+07	0.00221185
Sample RA2
Downstream volume = 795 mm3
Pore pressure oscillation method
Confining Pressure (MPa)	Pore Pressure (MPa)	Effective Pressure (Pc-Pp) (MPa)	Wave amplitude (MPa)	Wave period (s)	Gain (A)	Phase (θ)	Permeability × 10-20 (m2)	Error in Permeability × 10-20 (m2)	Permeability when ξ=0 (k0) × 10-20 (m2)	Error in k0 × 10-20 (m2)	log10 Storativity (β) (Pa-1)	log10 error in (β) (Pa-1)	Dimensionless Permeability (η)	Error in (η) × 10-11 (m2)	log10 dimensionless Storativity (ξ)	log10 error in (ξ)	Porosity From Storativity	Error Porosity From Storativity
44.5226	25.0123	19.5103	1.2	400	0.838764	0.461666	197.43	27.1433	138.453	7.47152	-9.76739	-9.2798	4.39327	5.26452e+10	-1.00887	-0.574588	0.00483121	0.0148473
90.8622	25.0104	65.8518	1.2	1000	0.10403	1.38219	3.76067	0.0880073	3.76067	0.439217	-18.7585	-19.0152	0.209194	1.29134	-10	-10.3104	4.93092e-12	2.73018e-12
90.8649	25.0102	65.8547	1.2	1000	0.0862458	1.40069	3.1125	0.0728385	3.1125	0.399047	-22.7533	-19.0576	0.173137	1.20313	-13.9949	-10.3524	4.98972e-16	2.47637e-12
36.5587	25.0103	11.5484	1.2	1000	0.349087	1.08789	13.513	0.31681	13.3937	0.858764	-10.9043	-11.2848	0.751683	9.41385e+07	-2.14587	-2.58025	0.00035242	0.000146766
89.5481	25.0105	64.5376	1.2	1000	0.0654406	1.39461	2.35789	0.0551795	2.35789	0.346838	-18.7585	-18.9969	0.131162	1.8673	-10	-10.2921	4.93092e-12	2.84752e-12
36.0624	25.0104	11.0519	1.2	1000	0.304089	1.11334	11.4767	0.268577	11.4767	0.78782	-18.7585	-19.0915	0.638411	2.46211	-10	-10.3868	4.93092e-12	2.29056e-12
31.7428	20.0078	11.735	1	400	0.119872	1.35909	13.3272	0.288938	13.3272	1.71248	-22.679	-18.9606	0.241485	2.01699	-14.0507	-10.3524	4.38785e-16	2.2941e-12
26.5501	15.018	11.5321	1	600	0.134976	1.31845	12.7067	0.261194	12.7067	1.17404	-22.4649	-18.7758	0.272445	1.80188	-13.9847	-10.2921	5.10773e-16	2.49682e-12
27.0501	15.0152	12.0349	0.5	600	0.129949	1.32165	12.2271	0.251329	12.2271	1.25832	-18.4801	-18.8355	0.262122	2.27986	-10	-10.3524	4.93092e-12	2.17547e-12
27.0595	10.0101	17.0494	0.5	500	0.0678701	1.44316	10.42	0.209525	10.42	1.59871	-18.2935	-18.5992	0.136054	12.1877	-10	-10.2921	4.93092e-12	2.43884e-12
41.5346	10.0034	31.5313	0.8	1000	0.0611618	1.44387	4.69545	0.0944148	4.69545	0.496889			0.122553	5.41976
41.5931	20.003	21.5901	1	1000	0.135935	1.35803	6.05914	0.131356	6.05914	0.565765	-18.6282	-19.0436	0.274418	1.09272	-10	-10.4361	4.93092e-12	1.89455e-12
41.6382	30.0027	11.6355	0.7	600	0.176686	1.28012	8.94868	0.228768	8.94868	1.39868	-18.8757	-19.0942	0.35902	2.47386	-10	-10.3104	4.93092e-12	2.98144e-12
69.8171	30.0026	39.8145	1	1000	0.133513	1.37063	4.0295	0.103012	4.0295	0.533534	-23.3005	-19.0946	0.269438	1.87097	-14.4247	-10.3104	1.85434e-16	2.97892e-12
69.8014	40.0029	29.7985	0.8	700	0.143478	1.32457	4.52513	0.13856	4.52513	0.959073	-19.0785	-19.2009	0.289956	2.4079	-10	-10.2921	4.93092e-12	3.71964e-12
69.9098	50.0036	19.9062	0.8	700	0.224004	1.21962	5.599	0.200948	5.599	1.22852	-19.2437	-19.3045	0.459689	2.2465	-10	-10.2988	4.93092e-12	4.28665e-12
70.1716	60.0041	10.1675	0.8	700	0.361055	1.05965	7.76883	0.317584	7.76883	1.66138	-19.3787	-19.4126	0.774344	3.16264	-10	-10.3278	4.93092e-12	4.56058e-12
69.9146	20.003	49.9115	1	1000	0.0668198	1.46412	2.95736	0.0641127	2.95736	0.39315	-22.6515	-18.8981	0.133939	4.71792	-14.0233	-10.2899	4.67311e-16	2.6488e-12
Transient pulse decay method
Confining Pressure (MPa)	Pore Pressure (MPa)	Effective Pressure (Pc-Pp) (MPa)	Brace et al. (1968) permeability × 10-20 (m2)	Cui et al. (2009) permeability × 10-20 (m2)
29.5828	5.26666	24.3161	6.66158	10.3751
29.597	3.34902	26.248	9.7928	15.2518
29.0607	2.24861	26.8121	11.5698	18.0194
28.9476	1.79971	27.1479	13.0156	20.2712
28.3332	1.36612	26.9671	22.7682	35.4603
28.6481	0.459936	28.1882	30.2068	47.0455
28.9109	0.780513	28.1304	7.91538	12.3278
41.9174	0.978088	40.9394	21.907	34.1191
42.4968	0.510279	41.9865	6.7816	10.562
42.7833	1.98726	40.796	4.77837	7.44207
42.9666	2.62239	40.3442	5.02349	7.82383
43.4734	3.24593	40.2275	4.58759	7.14495
43.4952	5.17273	38.3225	5.70465	8.8847
43.8427	9.35885	34.4838	5.13449	7.99671
71.4231	2.6086	68.8145	2.39991	3.73774
71.7238	1.76332	69.9605	6.79087	10.5764
71.4871	0.63881	70.8483	4.17082	6.49584
71.7583	1.89791	69.8604	2.60932	4.06389
71.7134	5.11426	66.5991	2.27273	3.53966
71.7003	5.03395	66.6663	2.84972	4.43829
RA6
Downstream volume = 795 mm3
Pore pressure oscillation method
Confining Pressure (MPa)	Pore Pressure (MPa)	Effective Pressure (Pc-Pp) (MPa)	Wave amplitude (MPa)	Wave period (s)	Gain (A)	Phase (θ)	Permeability × 10-20 (m2)	Error in Permeability × 10-20 (m2)	Permeability when ξ=0 (k0) × 10-20 (m2)	Error in k0 × 10-20 (m2)	log10 storativity (β) (Pa-1)	log10 error in (β) (Pa-1)	Dimensionless Permeability (η)	Error in (η)	log10 dimensionless Storativity (ξ)	log10 error in (ξ)	Porosity From Storativity	Error Porosity From Storativity
32.0688	24.6019	7.46692	0.2	100	0.803255	0.78028	2448.66	313.907	961.957	218.794	-8.14947	-8.78927	6.86557	0.770857	0.607631	-0.0846762	0.195802	0.0448758
62.3924	24.6015	37.7909	0.2	250	0.190883	1.37071	27.7425	0.823957	27.7425	5.15101	-18.7571	-10.5044	0.388916	0.00640487	-10	-1.7976	4.83266e-12	0.000864775
75.1429	24.6016	50.5413	0.5	500	0.0888855	1.52928	6.42333	0.23501	6.36564	1.43858	-10.3459	-10.829	0.180095	0.00453217	-1.58884	-2.1233	0.0012455	0.000409506
84.7824	24.6014	60.181	0.5	800	0.0585737	1.58219	2.64031	0.0829154	2.6159	0.642342	-10.3594	-11.0656	0.118444	0.00222781	-1.60228	-2.36181	0.00120754	0.000237501
94.343	24.6016	69.7414	0.5	1000	0.0334966	1.6696	1.21042	0.050355	1.19537	0.292307	-10.3242	-11.4597	0.0678745	0.00208572	-1.56707	-2.77534	0.00130954	9.58509e-05
86.0844	24.6013	61.4831	0.8	2000	0.0620798	1.56236	1.11737	0.0377031	1.10923	0.207358	-10.4506	-11.2079	0.125313	0.0027301	-1.69351	-2.50494	0.000978762	0.000171132
75.2114	24.6029	50.6086	0.5	1000	0.0376415	1.61999	1.35437	0.0379725	1.34342	0.278793	-10.4591	-11.4628	0.0759504	0.00106064	-1.70194	-2.76797	0.000959946	9.51673e-05
64.5523	24.6015	39.9508	0.5	1000	0.0455014	1.66637	1.65259	0.0550608	1.62455	0.340973	-10.16	-11.3244	0.0926691	0.00197027	-1.40294	-2.64343	0.00191092	0.000130884
54.2495	24.6015	29.6479	0.8	500	0.0353436	1.70361	2.56807	0.285379	2.52273	0.903319	-10.1933	-11.0295	0.0720026	0.00696845	-1.43624	-2.32818	0.0017699	0.000258082
54.3256	24.6029	29.7227	0.5	1000	0.0689421	1.58206	2.5149	0.0705967	2.48352	0.424361	-10.2269	-11.2563	0.139959	0.00196215	-1.46973	-2.56296	0.00163855	0.000153123
44.566	24.6015	19.9646	0.5	1000	0.115138	1.50162	4.18102	0.125887	4.13407	0.682878	-10.2427	-10.7091	0.234451	0.00399678	-1.48558	-2.00335	0.0015798	0.000539677
33.6247	24.601	9.02372	0.5	1000	0.36632	1.15541	14.1233	0.533034	14.0416	1.30443	-23.0084	-9.99589	0.791948	0.0209738	-14.2513	-1.28912	2.70949e-16	0.00278853
42.4262	24.6014	17.8248	0.5	1000	0.218512	1.35136	7.98963	0.196554	7.98658	0.958792	-11.6993	-10.7037	0.448017	0.00321816	-2.94218	-1.99693	5.52087e-05	0.000546482
54.3046	24.6015	29.7031	0.5	1000	0.110453	1.51009	4.01065	0.101838	3.96372	0.668328	-10.2267	-10.8213	0.224898	0.0020483	-1.46962	-2.11627	0.00163896	0.000416868
65.5413	24.6015	40.9398	0.5	1000	0.0697488	1.59694	2.53277	0.0745361	2.49377	0.528778	-10.1423	-11.016	0.142025	0.00228338	-1.3852	-2.31566	0.0019906	0.000266267
75.0791	24.6013	50.4778	0.5	2000	0.0953879	1.59445	1.75467	0.0476633	1.70888	0.25787	-9.90422	-11.035	0.196785	0.00246423	-1.14713	-2.35015	0.00344391	0.000254844
85.2327	24.6013	60.6314	0.8	2000	0.0749186	1.66443	1.38344	0.0348594	1.33981	0.182428	-9.85572	-11.2602	0.155152	0.00134505	-1.09863	-2.6432	0.00385082	0.000151742
94.8423	24.6014	70.2409	0.8	2000	0.0523258	1.77633	0.974241	0.0251063	0.93442	0.152115	-9.82182	-11.3073	0.109261	0.00108327	-1.06473	-2.74752	0.00416349	0.000136144
86.0811	24.6013	61.4798	1	4000	0.111031	1.68002	1.06087	0.025001	0.996185	0.0834903	-9.54727	-11.0858	0.237952	0.000826471	-0.790183	-2.59382	0.00783435	0.000226704
76.79	24.6015	52.1885	0.8	2000	0.0542769	1.68718	0.993863	0.026698	0.969362	0.154964	-9.99557	-11.4411	0.111462	0.00133716	-1.23848	-2.8486	0.00279068	0.000100044
64.8217	24.5994	40.2222	0.8	2000	0.0749038	1.65271	1.37956	0.0346775	1.33965	0.182671	-9.88877	-11.2127	0.154706	0.00131957	-1.13173	-2.56379	0.00356827	0.000169244
54.12	24.6014	29.5186	0.8	2000	0.105552	1.57842	1.94562	0.0471787	1.89291	0.217261	-9.88083	-11.1639	0.218202	0.00134395	-1.12374	-2.5039	0.00363448	0.000189388
44.5831	24.6018	19.9812	0.5	1000	0.0821821	1.5	2.94672	0.086417	2.94105	0.57473	-11.0016	-11.0118	0.16524	0.00263199	-2.24451	-2.30515	0.000275218	0.000268826
33.9428	24.6014	9.34142	0.5	1000	0.258464	1.27093	9.87383	0.258904	9.54277	1.05371	-10.6367	-10.942	0.553674	0.00598639	-1.87961	-2.23568	0.00063764	0.000315706
42.7223	24.6033	18.119	0.5	1000	0.162764	1.43387	5.93649	0.151124	5.88327	0.818826	-10.3314	-10.5875	0.332913	0.00307902	-1.57427	-1.88106	0.001288	0.000714208
53.7112	24.6017	29.1095	0.5	1000	0.0800995	1.57774	2.9117	0.0813209	2.86606	0.567528	-10.1236	-10.9179	0.163275	0.00225206	-1.36646	-2.2156	0.00207838	0.000333713
62.3454	24.6012	37.7442	0.8	2000	0.115047	1.57903	2.13437	0.0520532	2.06539	0.22719	-9.80222	-11.0867	0.239367	0.00157546	-1.04514	-2.42702	0.00435558	0.000226238
75.1395	24.6014	50.5381	0.8	2000	0.0780973	1.7241	1.4675	0.0375117	1.397	0.186312	-9.68913	-11.1282	0.16458	0.00155972	-0.932041	-2.5313	0.00565126	0.000205642
83.7447	24.6014	59.1433	0.8	2000	0.0574593	1.56121	1.03258	0.0271609	1.02639	0.159482	-10.5346	-11.5315	0.115803	0.00127041	-1.77747	-2.83629	0.000806711	8.12412e-05
94.4585	24.6014	69.8571	0.8	2000	0.0411197	1.83657	0.7681	0.0255082	0.73392	0.134728	-9.84894	-11.2356	0.0861423	0.00181987	-1.09186	-2.61002	0.00391138	0.000160581
86.1254	24.6014	61.5241	0.8	2000	0.0417891	1.82886	0.779788	0.0258559	0.745889	0.13584	-9.85266	-11.3067	0.087453	0.00184191	-1.09557	-2.72036	0.00387803	0.000136317
75.9503	24.6014	51.3489	0.8	2000	0.0476412	1.64729	0.863548	0.0241186	0.850565	0.145104	-10.1968	-11.4609	0.0968468	0.00133594	-1.43973	-2.79654	0.00175572	9.5583e-05
63.5894	24.6011	38.9883	0.8	2000	0.065704	1.65843	1.20466	0.0324094	1.17427	0.170703	-9.95826	-11.2784	0.135101	0.00163046	-1.20118	-2.62825	0.00304095	0.000145515
53.4881	24.6015	28.8866	0.5	1000	0.0463648	1.66409	1.68408	0.0786397	1.65545	0.430383	-10.1562	-11.1255	0.0944348	0.00340632	-1.39913	-2.42892	0.00192777	0.000206886
43.9584	24.6013	19.3572	0.5	1000	0.0794366	1.61979	2.91247	0.0948024	2.84223	0.56486	-9.95291	-11.0695	0.163316	0.00331477	-1.19582	-2.38319	0.00307866	0.000235387
33.4257	24.6015	8.82427	0.5	1000	0.256056	1.29748	9.38151	0.26941	9.44755	1.04826	-10.9455	-10.6713	0.52607	0.00790264	-2.18845	-1.96452	0.000313141	0.000588858
42.7999	24.6015	18.1984	0.5	1000	0.144838	1.47376	5.29915	0.136905	5.22091	0.769166	-10.1198	-10.6214	0.29715	0.00298578	-1.36269	-1.91575	0.00209652	0.000660546
RA12
Downstream volume = 629 mm3
Pore pressure oscillation method
Confining Pressure (MPa)	Pore Pressure (MPa)	Effective Pressure (Pc-Pp) (MPa)	Wave amplitude (MPa)	Wave period (s)	Gain (A)	Phase (θ)	Permeability × 10-20 (m2)	Error in Permeability × 10-20 (m2)	Permeability when ξ=0 (k0) × 10-20 (m2)	Error in k0 × 10-20 (m2)	log10 storativity (β) (Pa-1)	log10 error in (β) (Pa-1)	Dimensionless Permeability (η)	Error in (η)	log10 dimensionless Storativity (ξ)	log10 error in (ξ)	Porosity From Storativity	Error Porosity From Storativity
35.9162	24.7386	11.1776	1	1000	0.0609673	2.71166	2.87938	0.168917	1.66355	0.410923	-8.78013	-9.89868	0.211446	0.00987185	-0.0252794	-1.22167	0.0461899	0.00351559
96.129	24.7372	71.3917	1	4000	0.0989399	2.59181	1.39049	0.101054	0.677096	0.153585	-8.49986	-9.46253	0.408372	0.0246138	0.254962	-0.77155	0.088062	0.00959652
35.9021	24.7359	11.1663	1	1000	0.0523478	2.86214	2.6708	0.165726	1.42949	0.382074	-8.75391	-9.88711	0.195877	0.00979935	0.000876718	-1.21213	0.0490573	0.00360996
95.9453	24.7401	71.2052	1	4000	0.0966788	2.6381	1.42616	0.115528	0.662116	0.15186	-8.46631	-9.43601	0.418441	0.0285135	0.288578	-0.745405	0.095149	0.0102025
65.7271	24.737	40.9901	1	2000	0.0439148	3.20023	1.47534	0.0729137	0.598853	0.145131	-8.57717	-9.83867	0.216586	0.00807794	0.177645	-1.18972	0.0737006	0.00403619
95.9356	24.7368	71.1987	1	4000	0.0931516	2.67568	1.40094	0.121502	0.637204	0.148653	-8.45842	-9.41324	0.41139	0.0302359	0.296388	-0.721807	0.0968756	0.0107497
35.9017	24.736	11.1657	1	4000	0.0435403	3.01969	2.39213	0.193072	1.18819	0.347387	-8.7457	-9.80165	0.175483	0.01191	0.00908915	-1.11773	0.0499937	0.00439507
95.9532	24.738	71.2152	1	1000	0.0908415	2.69125	1.36457	0.0996208	0.621645	0.14701	-8.46556	-9.44897	0.400467	0.0242629	0.289282	-0.759274	0.0953035	0.00990133
96.3277	39.8564	56.4714	1	4000	0.166163	2.19129	1.32033	0.103678	0.693107	0.195381	-8.79048	-9.70853	0.641986	0.0308053	0.28842	-0.81542	0.0951143	0.0114867
96.3387	65.3054	31.0333	1	4000	0.151733	2.19992	1.29668	0.100137	0.742929	0.349308	-9.2492	-10.1844	0.535864	0.0154681	0.19443	-1.09896	0.0766049	0.00889297
96.3358	85.3504	10.9854	1	2000	0.174297	2.08979	2.27389	0.199799	1.33813	0.745549	-9.44344	-10.3186	0.601574	0.016222	0.189538	-1.11956	0.0757469	0.0100961
96.0941	24.7354	71.3588	1	1000	0.082486	2.77969	1.28834	0.115016	0.564009	0.140401	-8.45746	-9.39836	0.378127	0.0286877	0.297314	-0.70618	0.0970823	0.0111235
65.7336	24.7389	40.9946	1	4000	0.110806	2.48803	1.49284	0.0708551	0.759784	0.162813	-8.51243	-9.72106	0.438123	0.0154348	0.24243	-1.05907	0.0855572	0.00529208
96.2096	24.7398	71.4698	1	4000	0.0826133	2.75941	1.25312	0.120046	0.565078	0.140583	-8.48041	-9.40714	0.367665	0.0301128	0.274474	-0.714147	0.0921086	0.0109037
96.3355	55.4008	40.9347	1	2000	0.112272	2.56786	1.47535	0.158419	0.646958	0.293241	-8.95758	-9.84697	0.515315	0.0272481	0.365342	-0.81808	0.113545	0.0146481
86.0388	55.4001	30.6387	1	2000	0.131898	2.38463	1.53164	0.19453	0.761486	0.424995	-9.02648	-9.75148	0.535274	0.0343893	0.296438	-0.709079	0.0968867	0.0182499
75.6237	55.3988	20.2248	1	1000	0.0612766	2.90965	1.5053	0.219765	0.703722	0.518178	-9.15749	-9.88051	0.262641	0.0197033	0.165407	-0.838007	0.0716528	0.0135587
66.3994	55.4021	10.9973	1	1000	0.111252	2.36022	2.14223	0.255435	1.28204	0.701255	-9.22957	-9.97993	0.374116	0.0223646	0.0933765	-0.938954	0.060702	0.0107854
35.9005	24.7376	11.1629	1	1000	0.0379222	3.08954	2.108	0.330155	1.03384	0.410473	-8.78048	-9.50733	0.154758	0.0212368	-0.0256528	-0.807952	0.0461502	0.00865617
RA13
Downstream volume = 795 mm3
Pore pressure oscillation method
Confining Pressure (MPa)	Pore Pressure (MPa)	Effective Pressure (Pc-Pp) (MPa)	Wave amplitude (MPa)	Wave period (s)	Gain (A)	Phase (θ)	Permeability × 10-20 (m2)	Error in Permeability × 10-20 (m2)	Permeability when ξ=0 (k0) × 10-20 (m2)	Error in k0 × 10-20 (m2)	log10 storativity (β) (Pa-1)	log10 error in (β) (Pa-1)	Dimensionless Permeability (η)	Error in (η)	log10 dimensionless Storativity (ξ)	log10 error in (ξ)	Porosity From Storativity	Error Porosity From Storativity
35.5928	25.1919	10.401	0.7	200	0.310601	1.34726	55.1834	3.36336	51.5992	10.5062	-9.41038	-9.5984	0.69892	0.034667	-0.699266	-0.942172	0.0111043	0.00720228
85.6234	25.1923	60.4311	1	15000	0.0361802	2.83632	0.124313	0.00310456	0.0762251	0.00803697	-8.96511	-10.5668	0.118088	0.000887415	-0.253985	-2.33152	0.0309578	0.000774687
37.5668	25.1925	12.3743	1	4000	0.0406798	2.81323	0.529922	0.0136543	0.321446	0.0454079	-8.91374	-10.4996	0.134237	0.00125752	-0.202605	-2.18838	0.0348458	0.000904326
37.5268	25.1924	12.3343	1	4000	0.0415944	2.59449	0.468643	0.0129754	0.328686	0.0459205	-9.07066	-10.617	0.118714	0.00153685	-0.359537	-2.19707	0.0242783	0.000690102
52.5566	25.1925	27.3641	1	4000	0.0134796	3.38363	0.218751	0.00827278	0.106436	0.02608	-9.11427	-10.5243	0.0554128	0.00144887	-0.403142	-1.96274	0.0219591	0.000854296
37.7965	26.2872	11.5093	1	4000	0.0524647	2.7136	0.65262	0.0170903	0.397801	0.0513885	-8.8626	-10.4344	0.172381	0.00159014	-0.124855	-2.08237	0.0416775	0.00111715
79.7008	25.1925	54.5083	1.2	16000	0.0574093	2.49909	0.163162	0.00386587	0.113626	0.00859024	-8.95899	-10.5885	0.165147	0.000467757	-0.247856	-2.71997	0.0313978	0.000736907
38.9024	25.1924	13.71	1	4000	0.0389892	2.92038	0.546246	0.0157181	0.308067	0.044449	-8.85532	-10.3809	0.138372	0.00203054	-0.144197	-1.92512	0.039862	0.00118846
53.3645	25.1924	28.1721	1	8000	0.0517137	2.7425	0.341769	0.00825623	0.204422	0.0213198	-8.82109	-10.4396	0.17315	0.00087063	-0.109967	-2.3468	0.0431309	0.00103821
Transient pulse decay method
Confining Pressure (MPa)	Pore Pressure (MPa)	Effective Pressure (Pc-Pp) (MPa)	Brace et al. (1968) permeability × 10-20 (m2)	Cui et al. (2009) permeability × 10-20 (m2)
40.1368	25.9185	14.2183	0.454234	0.652532
60.4507	26.8654	33.5853	0.271117	0.389474
76.834	25.8454	50.9886	0.201536	0.289517
54.5147	25.625	28.8897	0.286305	0.411293
39.4871	26.8118	12.6753	0.590635	0.848479
81.4731	26.1294	55.3437	0.205839	0.295698
77.6404	25.8361	51.8042	0.190061	0.273033
81.6049	25.5472	56.0577	0.166902	0.239764
81.6288	49.3271	32.3017	0.256118	0.367927
82.1098	70.6239	11.4859	0.414666	0.595689
RA14
Downstream volume = 795 mm3
Pore pressure oscillation method
Confining Pressure (MPa)	Pore Pressure (MPa)	Effective Pressure (Pc-Pp) (MPa)	Wave amplitude (MPa)	Wave period (s)	Gain (A)	Phase (θ)	Permeability × 10-20 (m2)	Error in Permeability × 10-20 (m2)	Permeability when ξ=0 (k0) × 10-20 (m2)	Error in k0 × 10-20 (m2)	log10 storativity (β) (Pa-1)	log10 error in (β) (Pa-1)	Dimensionless Permeability (η)	Error in (η)	log10 dimensionless Storativity (ξ)	log10 error in (ξ)	Porosity From Storativity	Error Porosity From Storativity
35.7175	25.1964	10.5211	0.5	250	0.159121	1.49232	18.8433	0.684755	18.3143	3.83766	-9.75904	-10.2328	0.33166	0.00811193	-1.08592	-1.61541	0.00497673	0.0016716
37.6108	25.1964	12.4143	0.5	250	0.0434962	1.94404	5.32903	0.577148	4.94717	1.97672	-9.58985	-10.4245	0.0937959	0.00874438	-0.916737	-1.81156	0.00734729	0.00107513
37.5999	25.1957	12.4042	0.7	500	0.098939	1.7057	6.00495	0.17151	5.64913	1.05829	-9.48929	-10.7209	0.211379	0.00303202	-0.816191	-2.13926	0.00926134	0.000543285
53.7057	25.1953	28.5104	1	1000	0.0440708	2.19758	1.47206	0.0526431	1.25322	0.24624	-9.32454	-10.7326	0.103634	0.00246524	-0.651453	-2.2081	0.0135335	0.000528859
36.2748	25.1948	11.08	0.8	1000	0.0794589	1.93257	2.55352	0.0761038	2.26454	0.368978	-9.27334	-10.763	0.179766	0.0029105	-0.60026	-2.30005	0.0152266	0.000493109
53.4033	25.1927	28.2106	1	2000	0.0942061	1.92687	1.54836	0.0377305	1.34426	0.15027	-9.17658	-10.7423	0.217989	0.00125635	-0.503552	-2.40481	0.0190245	0.000517128
37.1801	25.1929	11.9871	0.8	1000	0.0665363	1.99637	2.14569	0.063265	1.89459	0.336627	-9.30105	-10.7482	0.151044	0.00237616	-0.62802	-2.24818	0.0142838	0.000510176
53.1004	25.1927	27.9077	1	2000	0.0905781	1.92374	1.47727	0.036116	1.29205	0.147278	-9.20496	-10.7842	0.207981	0.00125205	-0.531938	-2.48721	0.0178208	0.000469555
54.6912	35.145	19.5461	0.8	1000	0.070012	2.04135	1.63502	0.0548745	1.40898	0.337483	-9.44519	-10.833	0.162887	0.00220668	-0.550032	-2.20142	0.0170936	0.000699804
54.7463	44.8987	9.84759	0.8	1000	0.142576	1.71797	2.46393	0.0912247	2.20166	0.486787	-9.60286	-10.8131	0.322414	0.00329456	-0.529186	-2.01446	0.017934	0.00110522
54.7073	45.0977	9.60962	0.8	1000	0.146067	1.73692	2.54981	0.0888528	2.24565	0.493004	-9.554	-10.9043	0.335297	0.00213008	-0.477047	-2.19837	0.0202217	0.000902721
54.9462	25.1925	29.7536	0.8	2000	0.0742153	2.08379	1.26101	0.0356325	1.05721	0.147933	-9.14477	-10.6544	0.177532	0.00246235	-0.471746	-2.21461	0.02047	0.000633078
73.7518	25.1925	48.5593	1	4000	0.0429475	2.48378	0.410121	0.0114088	0.305337	0.0419768	-9.10122	-10.6544	0.115479	0.00151989	-0.428201	-2.28691	0.0226289	0.000633098
36.9137	25.1927	11.721	1	2000	0.0437637	2.46874	0.831329	0.023336	0.622296	0.10189	-9.10274	-10.641	0.11704	0.00158849	-0.429719	-2.24422	0.02255	0.000652937
75.0885	25.1925	49.8959	1	8000	0.089339	1.87798	0.356632	0.0084576	0.31856	0.0253181	-9.27265	-10.8901	0.200835	0.000596026	-0.599625	-2.82245	0.0152489	0.000367979
36.4535	25.1928	11.2607	1	2000	0.039815	2.46416	0.743961	0.0226457	0.566054	0.0971642	-9.15785	-10.6415	0.10474	0.0017897	-0.484819	-2.17241	0.019863	0.000652251
73.7557	24.9933	48.7624	1	8000	0.0885822	2.04875	0.384876	0.00921094	0.318287	0.0252323	-9.06931	-10.6821	0.215075	0.000958338	-0.401192	-2.55769	0.0240809	0.000587339
38.1595	24.9937	13.1658	1	2000	0.0356482	2.57063	0.700457	0.0205584	0.510656	0.0919832	-9.13055	-10.6656	0.097858	0.00153432	-0.462427	-2.26419	0.020914	0.000610109
74.4112	24.9934	49.4178	1	8000	0.0845696	2.04737	0.363893	0.00856733	0.303762	0.0246403	-9.09955	-10.7274	0.203349	0.000472839	-0.431436	-2.81076	0.022461	0.000529156
74.4134	39.9716	34.4418	1	4000	0.0748352	2.1545	0.404026	0.0127443	0.326505	0.0542428	-9.38395	-10.8698	0.185727	0.000960896	-0.395977	-2.45269	0.0243718	0.000796251
73.8422	59.6282	14.214	1	4000	0.197917	1.66251	0.665542	0.0274402	0.567908	0.0922448	-9.63672	-10.9597	0.473247	0.001591	-0.352559	-2.22544	0.0269343	0.00128026
73.9176	49.7757	24.1419	1	4000	0.12587	1.8537	0.507007	0.0183073	0.432604	0.0714347	-9.55718	-10.9968	0.297401	0.000847295	-0.406829	-2.64444	0.0237703	0.000863709
74.0344	39.9728	34.0616	1	4000	0.0782218	2.10518	0.415136	0.013162	0.341358	0.055514	-9.40646	-10.9014	0.190841	0.00107021	-0.418464	-2.54062	0.023142	0.000740466
74.2573	49.7758	24.4815	1	4000	0.118756	1.8748	0.477462	0.0173798	0.407795	0.0693162	-9.56897	-10.9835	0.280071	0.00109348	-0.418622	-2.44618	0.0231336	0.000890658
74.4159	59.629	14.787	1	2000	0.0811922	2.05195	0.546292	0.0238474	0.458241	0.139411	-9.73555	-11.0722	0.194228	0.00156605	-0.451382	-2.37287	0.0214527	0.000988099
74.4185	64.804	9.61457	1	2000	0.114087	1.84026	0.67802	0.030472	0.593764	0.167653	-9.83904	-11.1438	0.262264	0.00160562	-0.494036	-2.38825	0.0194459	0.000964014
74.8796	64.804	10.0756	1	2000	0.116494	1.90075	0.717103	0.0319237	0.606464	0.169415	-9.74243	-11.0722	0.277381	0.00148392	-0.397427	-2.39653	0.0242905	0.00113675
74.7656	25.8905	48.8751	1	4000	0.0542118	2.28396	0.313438	0.00777297	0.250294	0.0281988	-9.15379	-10.7554	0.135977	0.000842967	-0.463733	-2.57876	0.0208512	0.000521831
94.6739	24.9948	69.6791	1	8000	0.0364934	2.59849	0.182774	0.0047669	0.13069	0.0161118	-9.09689	-10.6708	0.102142	0.00104143	-0.428737	-2.35566	0.022601	0.000602913
76.3466	24.9949	51.3517	1	6000	0.0285028	2.56701	0.181279	0.00466984	0.136063	0.0204763	-9.25027	-10.8335	0.0759808	0.000724616	-0.582121	-2.54898	0.0158761	0.000414482
38.956	24.9948	13.9612	1	6000	0.0870159	2.09356	0.514339	0.0123131	0.416797	0.036002	-9.03291	-10.6537	0.215578	0.000966684	-0.364755	-2.61391	0.0261884	0.000627066
94.8244	24.9947	69.8297	1	8000	0.0346944	2.65171	0.177932	0.00445751	0.124239	0.0157061	-9.08435	-10.6849	0.0994362	0.000787772	-0.416204	-2.47681	0.0232627	0.000583617
36.9086	24.995	11.9136	1	4000	0.0492323	2.33515	0.446939	0.0112843	0.352809	0.0450505	-9.14174	-10.7297	0.124887	0.0010485	-0.473582	-2.46277	0.0203837	0.000526454
55.9555	25.1939	30.7616	1	6000	0.0540018	2.36373	0.334228	0.00820628	0.256075	0.0282282	-9.07073	-10.6863	0.141172	0.000895393	-0.397673	-2.59857	0.0242768	0.000588305
75.6403	25.1939	50.4464	1	6000	0.033202	2.64794	0.223302	0.00594577	0.1573	0.0220909	-9.11578	-10.6858	0.0943186	0.00104499	-0.442728	-2.36027	0.0218845	0.00058896
94.8254	25.1939	69.6315	1	8000	0.0312245	2.67562	0.158688	0.00412358	0.110942	0.0148812	-9.12819	-10.711	0.0893691	0.000878015	-0.455134	-2.42661	0.0212682	0.000555794
35.7532	25.1941	10.5592	1	4000	0.0510489	2.3337	0.462056	0.0120813	0.36305	0.0458365	-9.12778	-10.7057	0.13011	0.00132086	-0.454723	-2.40421	0.0212883	0.000562654
56.0058	25.1938	30.812	1	8000	0.0715824	2.19587	0.319694	0.0077555	0.254865	0.02263	-9.05588	-10.6708	0.180043	0.000970889	-0.382828	-2.5766	0.025121	0.000609642
94.8269	25.1938	69.6331	1	8000	0.0278478	2.78996	0.149249	0.00385437	0.0989345	0.0140492	-9.10615	-10.6918	0.0840528	0.000797695	-0.433097	-2.41792	0.0223752	0.000580968
38.2367	25.1946	13.0421	1	2000	0.0133977	3.80409	0.552956	0.0401833	0.190329	0.0563078	-8.79148	-9.90456	0.0778548	0.00472147	-0.118404	-1.30666	0.0461807	0.00355941
93.5177	25.1938	68.3239	1	8000	0.0285162	2.77955	0.152365	0.00398788	0.101311	0.0142174	-9.10101	-10.6788	0.0858075	0.000875671	-0.427961	-2.37676	0.0226414	0.000598633
93.5314	43.1078	50.4236	1	6000	0.0440509	2.47124	0.157403	0.0052281	0.11754	0.0248886	-9.46765	-10.9494	0.118096	0.000598379	-0.424124	-2.63853	0.0228423	0.000753372
93.5403	60.0269	33.5134	1	3000	0.0283896	2.67401	0.149295	0.00813214	0.105782	0.049169	-9.79545	-11.047	0.0801675	0.00146736	-0.5064	-2.20436	0.0189001	0.00105896
93.5503	79.9332	13.617	1	2000	0.0478301	2.38603	0.263282	0.0141839	0.203302	0.111636	-9.94187	-11.1862	0.124024	0.00112185	-0.447339	-2.33352	0.0216534	0.00123359
94.0044	82.9188	11.0856	1	1500	0.0357487	2.60371	0.274262	0.0193351	0.19612	0.139771	-9.95598	-11.0814	0.100049	0.00202995	-0.435973	-2.06678	0.0222275	0.00166513
93.9182	65.0031	28.9151	1	3000	0.0480324	2.39457	0.215127	0.0117308	0.165256	0.0646828	-9.78522	-11.0414	0.1252	0.00200658	-0.437987	-2.19689	0.0221247	0.0012267
94.1921	44.103	50.089	1	6000	0.0481497	2.40754	0.164283	0.00569702	0.125269	0.0260488	-9.48643	-10.9449	0.126437	0.000901976	-0.426011	-2.49632	0.0227433	0.000791303
94.3608	25.1938	69.167	1	8000	0.0237198	2.81483	0.126373	0.00351695	0.0842601	0.0129616	-9.17253	-10.7217	0.0711696	0.000938021	-0.499475	-2.3458	0.0192039	0.00054223
RC7
Downstream volume = 795 mm3
Confining Pressure (MPa)	Pore Pressure (MPa)	Effective Pressure (Pc-Pp) (MPa)	Wave amplitude (MPa)	Wave period (s)	Gain (A)	Phase (θ)	Permeability × 10-20 (m2)	Error in Permeability × 10-20 (m2)	Permeability when ξ=0 (k0) × 10-20 (m2)	Error in k0 × 10-20 (m2)	log10 storativity (β) (Pa-1)	log10 error in (β) (Pa-1)	Dimensionless Permeability (η)	Error in (η)	log10 dimensionless Storativity (ξ)	log10 error in (ξ)
33.0895	24.6015	8.48803			0.0823942	1.85193	1.98275	0.047764	1.80535	0.250985	-9.12247	-10.6322	0.181599	0.00223601	-0.684733	-2.31909
41.9121	24.6015	17.3106			0.0443855	2.05864	1.08342	0.0318639	0.970184	0.183609	-9.21736	-10.6773	0.0992293	0.00207263	-0.779624	-2.33216
41.5402	24.6015	16.9387			0.0352402	2.18156	0.882577	0.0336217	0.770005	0.163511	-9.21811	-10.5681	0.0808347	0.00258483	-0.78037	-2.18129
41.6849	24.6016	17.0832			0.0653188	1.99504	1.07671	0.0264618	0.953085	0.120142	-9.07762	-10.6161	0.147898	0.0019582	-0.639886	-2.32809
54.0239	24.6015	29.4224			0.0268414	2.36298	0.47139	0.0146092	0.390891	0.0767631	-9.20317	-10.7197	0.0647614	0.00149342	-0.76543	-2.41195
56.2391	24.6014	31.6378			0.0408827	2.28187	0.431663	0.00942986	0.357396	0.0455552	-9.05559	-10.7129	0.098839	0.000688438	-0.617856	-2.70458
64.0555	24.6016	39.4539			0.0199732	2.75011	0.206386	0.00536336	0.145411	0.0252381	-9.06909	-10.6373	0.0567084	0.000890556	-0.631348	-2.38369
64.3328	24.6014	39.7314			0.0195459	2.79138	0.206263	0.00534993	0.142299	0.0224523	-9.05148	-10.6265	0.0566744	0.000885355	-0.613749	-2.38225
73.8375	24.6014	49.2362			0.0198933	2.85765	0.131121	0.00301026	0.0868979	0.0118664	-8.99727	-10.6382	0.0600461	0.000595516	-0.559533	-2.54846
83.6085	24.6012	59.0072			0.0295364	2.60425	0.0880238	0.00186364	0.064526	0.00525413	-8.97426	-10.6528	0.0806199	0.000356426	-0.53653	-2.864
82.5216	24.6012	57.9204			0.0211675	2.74795	0.0658925	0.00141462	0.0462333	0.00444306	-9.04162	-10.7127	0.0603501	0.000342434	-0.603892	-2.81729
94.4311	24.6013	69.8298			0.0167251	3.09078	0.0626717	0.00140229	0.0365271	0.00394668	-8.92689	-10.5792	0.0574003	0.000486853	-0.489161	-2.54153
76.8434	24.6013	52.2422			0.0205475	2.94689	0.0718158	0.0015627	0.0448785	0.00437686	-8.91955	-10.5851	0.0657752	0.000440163	-0.481816	-2.63644
55.5921	24.6012	30.9909			0.0246216	2.84448	0.103169	0.0023064	0.0672275	0.00728675	-8.89698	-10.5475	0.075593	0.00063724	-0.459247	-2.50101
35.7151	24.6012	11.1139			0.0716569	2.09655	0.234022	0.00488652	0.196098	0.0125008	-8.91707	-10.6014	0.17147	0.000463098	-0.47934	-2.97055
36.0463	24.6013	11.445			0.0678401	2.15274	0.225579	0.00471643	0.185603	0.0121574	-8.8935	-10.5755	0.165284	0.000480224	-0.455769	-2.86553
92.6341	24.6013	68.0328			0.0152597	3.20544	0.0611731	0.00142333	0.0333261	0.00376921	-8.89655	-10.5281	0.0560277	0.000594685	-0.458814	-2.40479
37.6322	24.6013	13.0309			0.0570075	2.26092	0.194427	0.00405439	0.15586	0.00971444	-8.89339	-10.5785	0.142459	0.000353082	-0.455652	-2.98067
90.5029	24.6012	65.9016			0.0128064	3.28266	0.0531144	0.00121261	0.0279673	0.00345146	-8.93389	-10.5759	0.0486468	0.000467901	-0.496161	-2.49058

## Sheet: Sheet2
CP	PP	Peff	k	e_k	k0	e_k0	beta	e_beta	eta	e_eta	xi	e_xi	gain	phase		Confining Pressure (Mpa)	Pore Pressure (Mpa)	Simple Effective Pressure (pc-pp) (MPa)	Permeability × 10-20 (m2)	Error in Permeability × 10-20 (m2)	Permeability when ξ=0 (k0) × 10-20 (m2)	Error in k0 × 10-20 (m2)	Storativity (β) × 10-10 (Pa-1)	Error in (β) (Pa-1)	Dimensionless Permeability (η)	Error in (η)	Dimensionless Storativity (ξ)	Error in (ξ)	Gain (A)	Phase (θ)
RA2B																RA2b
44.5226	25.0123	19.5103	2.23207e-18	2.71433e-19	1.5653e-18	7.47152e-20	1.93153e-10	5.25046e-10	4.39327	0.526452	0.097978	0.266325	0.838764	0.461666		44.5226	25.0123	19.5103	223.207	27.1433	156.53	7.47152	1.93153e-10	5.25046e-10	4.39327	0.526452	0.097978	0.266325	0.838764	0.461666
90.8622	25.0104	65.8518	4.25155e-20	8.80073e-22	4.25155e-20	4.39217e-21	1.97154e-19	9.6558e-20	0.209194	1.29134e-11	1e-10	4.89332e-11	0.10403	1.38219		90.8622	25.0104	65.8518	4.25155	0.0880073	4.25155	0.439217	1.97154e-19	9.6558e-20	0.209194	1.29134e-11	1e-10	4.89332e-11	0.10403	1.38219
90.8649	25.0102	65.8547	3.51876e-20	7.28385e-22	3.51876e-20	3.99047e-21	1.99508e-23	8.75828e-20	0.173137	1.20313e-11	1.01193e-14	4.4423e-11	0.0862458	1.40069		90.8649	25.0102	65.8547	3.51876	0.0728385	3.51876	0.399047	1.99508e-23	8.75828e-20	0.173137	1.20313e-11	1.01193e-14	4.4423e-11	0.0862458	1.40069
36.5587	25.0103	11.5484	1.52768e-19	3.1681e-21	1.51419e-19	8.58764e-21	1.4091e-11	5.1907e-12	0.751683	0.000941385	0.00714715	0.00262875	0.349087	1.08789		36.5587	25.0103	11.5484	15.2768	0.31681	15.1419	0.858764	1.4091e-11	5.1907e-12	0.751683	0.000941385	0.00714715	0.00262875	0.349087	1.08789
89.5481	25.0105	64.5376	2.66567e-20	5.51795e-22	2.66567e-20	3.46838e-21	1.97154e-19	1.00708e-19	0.131162	1.8673e-11	1e-10	5.10398e-11	0.0654406	1.39461		89.5481	25.0105	64.5376	2.66567	0.0551795	2.66567	0.346838	1.97154e-19	1.00708e-19	0.131162	1.8673e-11	1e-10	5.10398e-11	0.0654406	1.39461
36.0624	25.0104	11.0519	1.29747e-19	2.68577e-21	1.29747e-19	7.8782e-21	1.97154e-19	8.10102e-20	0.638411	2.46211e-11	1e-10	4.10389e-11	0.304089	1.11334		36.0624	25.0104	11.0519	12.9747	0.268577	12.9747	0.78782	1.97154e-19	8.10102e-20	0.638411	2.46211e-11	1e-10	4.10389e-11	0.304089	1.11334
31.7428	20.0078	11.735	1.39572e-19	2.88938e-21	1.39572e-19	1.71248e-20	2.19307e-23	1.09484e-19	0.241485	2.01699e-11	8.89865e-15	4.44246e-11	0.119872	1.35909		31.7428	20.0078	11.735	13.9572	0.288938	13.9572	1.71248	2.19307e-23	1.09484e-19	0.241485	2.01699e-11	8.89865e-15	4.44246e-11	0.119872	1.35909
26.5501	15.018	11.5321	1.26062e-19	2.61194e-21	1.26062e-19	1.17404e-20	3.40107e-23	1.6758e-19	0.272445	1.80188e-11	1.03586e-14	5.10395e-11	0.134976	1.31845		26.5501	15.018	11.5321	12.6062	0.261194	12.6062	1.17404	3.40107e-23	1.6758e-19	0.272445	1.80188e-11	1.03586e-14	5.10395e-11	0.134976	1.31845
27.0501	15.0152	12.0349	1.21301e-19	2.51329e-21	1.21301e-19	1.25832e-20	3.28396e-19	1.46042e-19	0.262122	2.27986e-11	1e-10	4.44239e-11	0.129949	1.32165		27.0501	15.0152	12.0349	12.1301	0.251329	12.1301	1.25832	3.28396e-19	1.46042e-19	0.262122	2.27986e-11	1e-10	4.44239e-11	0.129949	1.32165
27.0595	10.0101	17.0494	1.00891e-19	2.09525e-21	1.00891e-19	1.59871e-20	4.92596e-19	2.51631e-19	0.136054	1.21877e-10	1e-10	5.10407e-11	0.0678701	1.44316		27.0595	10.0101	17.0494	10.0891	0.209525	10.0891	1.59871	4.92596e-19	2.51631e-19	0.136054	1.21877e-10	1e-10	5.10407e-11	0.0678701	1.44316
41.5346	10.0034	31.5313	4.54628e-20	9.44148e-22	4.54628e-20	4.96889e-21	-6.19203e-25	-2.52858e-19	0.122553	5.41976e-11	-1.25618e-16	5.12974e-11	0.0611618	1.44387		41.5346	10.0034	31.5313	4.54628	0.0944148	4.54628	0.496889	-6.19203e-25	-2.52858e-19	0.122553	5.41976e-11	-1.25618e-16	5.12974e-11	0.0611618	1.44387
41.5931	20.003	21.5901	6.34517e-20	1.31356e-21	6.34517e-20	5.65765e-21	2.46509e-19	9.0444e-20	0.274418	1.09272e-11	1e-10	3.66327e-11	0.135935	1.35803		41.5931	20.003	21.5901	6.34517	0.131356	6.34517	0.565765	2.46509e-19	9.0444e-20	0.274418	1.09272e-11	1e-10	3.66327e-11	0.135935	1.35803
41.6382	30.0027	11.6355	1.10477e-19	2.28768e-21	1.10477e-19	1.39868e-20	1.64349e-19	8.04922e-20	0.35902	2.47386e-11	1e-10	4.89339e-11	0.176686	1.28012		41.6382	30.0027	11.6355	11.0477	0.228768	11.0477	1.39868	1.64349e-19	8.04922e-20	0.35902	2.47386e-11	1e-10	4.89339e-11	0.176686	1.28012
69.8171	30.0026	39.8145	4.97467e-20	1.03012e-21	4.97467e-20	5.33534e-21	6.18059e-24	8.04244e-20	0.269438	1.87097e-11	3.76064e-15	4.89349e-11	0.133513	1.37063		69.8171	30.0026	39.8145	4.97467	0.103012	4.97467	0.533534	6.18059e-24	8.04244e-20	0.269438	1.87097e-11	3.76064e-15	4.89349e-11	0.133513	1.37063
69.8014	40.0029	29.7985	6.68273e-20	1.3856e-21	6.68273e-20	9.59073e-21	1.23264e-19	6.29633e-20	0.289956	2.4079e-11	1e-10	5.10396e-11	0.143478	1.32457		69.8014	40.0029	29.7985	6.68273	0.13856	6.68273	0.959073	1.23264e-19	6.29633e-20	0.289956	2.4079e-11	1e-10	5.10396e-11	0.143478	1.32457
69.9098	50.0036	19.9062	9.67655e-20	2.00948e-21	9.67655e-20	1.22852e-20	9.86112e-20	4.96028e-20	0.459689	2.2465e-11	1e-10	5.02605e-11	0.224004	1.21962		69.9098	50.0036	19.9062	9.67655	0.200948	9.67655	1.22852	9.86112e-20	4.96028e-20	0.459689	2.2465e-11	1e-10	5.02605e-11	0.224004	1.21962
70.1716	60.0041	10.1675	1.52691e-19	3.17584e-21	1.52691e-19	1.66138e-20	8.21763e-20	3.86705e-20	0.774344	3.16264e-11	1e-10	4.70144e-11	0.361055	1.05965		70.1716	60.0041	10.1675	15.2691	0.317584	15.2691	1.66138	8.21763e-20	3.86705e-20	0.774344	3.16264e-11	1e-10	4.70144e-11	0.361055	1.05965
69.9146	20.003	49.9115	3.09697e-20	6.41127e-22	3.09697e-20	3.9315e-21	2.3362e-23	1.26451e-19	0.133939	4.71792e-11	9.47716e-15	5.12967e-11	0.0668198	1.46412		69.9146	20.003	49.9115	3.09697	0.0641127	3.09697	0.39315	2.3362e-23	1.26451e-19	0.133939	4.71792e-11	9.47716e-15	5.12967e-11	0.0668198	1.46412
RA6																RA6					0	0
32.0688	24.6019	7.46692	2.74945e-17	3.13907e-18	1.08012e-17	2.18794e-18	7.95881e-09	1.62452e-09	6.86557	0.770857	4.05164	0.822856	0.803255	0.78028		32.0688	24.6019	7.46692	2749.45	313.907	1080.12	218.794	7.95881e-09	1.62452e-09	6.86557	0.770857	4.05164	0.822856	0.803255	0.78028
62.3924	24.6015	37.7909	3.11501e-19	8.23957e-21	3.11501e-19	5.15101e-20	1.96437e-19	3.13059e-11	0.388916	0.00640487	1e-10	0.0159369	0.190883	1.37071		62.3924	24.6015	37.7909	31.1501	0.823957	31.1501	5.15101	1.96437e-19	3.13059e-11	0.388916	0.00640487	1e-10	0.0159369	0.190883	1.37071
75.1429	24.6016	50.5413	7.21232e-20	2.3501e-21	7.14754e-20	1.43858e-20	5.06269e-11	1.48246e-11	0.180095	0.00453217	0.0257726	0.00752837	0.0888855	1.52928		75.1429	24.6016	50.5413	7.21232	0.23501	7.14754	1.43858	5.06269e-11	1.48246e-11	0.180095	0.00453217	0.0257726	0.00752837	0.0888855	1.52928
84.7824	24.6014	60.181	2.96462e-20	8.29154e-22	2.9372e-20	6.42342e-21	4.90843e-11	8.5979e-12	0.118444	0.00222781	0.0249871	0.00434704	0.0585737	1.58219		84.7824	24.6014	60.181	2.96462	0.0829154	2.9372	0.642342	4.90843e-11	8.5979e-12	0.118444	0.00222781	0.0249871	0.00434704	0.0585737	1.58219
94.343	24.6016	69.7414	1.3591e-20	5.0355e-22	1.3422e-20	2.92307e-21	5.32299e-11	3.46991e-12	0.0678745	0.00208572	0.0270977	0.00167748	0.0334966	1.6696		94.343	24.6016	69.7414	1.3591	0.050355	1.3422	0.292307	5.32299e-11	3.46991e-12	0.0678745	0.00208572	0.0270977	0.00167748	0.0334966	1.6696
86.0844	24.6013	61.4831	1.25462e-20	3.77031e-22	1.24547e-20	2.07358e-21	3.97849e-11	6.19526e-12	0.125313	0.0027301	0.0202531	0.00312654	0.0620798	1.56236		86.0844	24.6013	61.4831	1.25462	0.0377031	1.24547	0.207358	3.97849e-11	6.19526e-12	0.125313	0.0027301	0.0202531	0.00312654	0.0620798	1.56236
75.2114	24.6029	50.6086	1.52076e-20	3.79725e-22	1.50847e-20	2.78793e-21	3.90177e-11	3.44491e-12	0.0759504	0.00106064	0.0198637	0.00170622	0.0376415	1.61999		75.2114	24.6029	50.6086	1.52076	0.0379725	1.50847	0.278793	3.90177e-11	3.44491e-12	0.0759504	0.00106064	0.0198637	0.00170622	0.0376415	1.61999
64.5523	24.6015	39.9508	1.85558e-20	5.50608e-22	1.8241e-20	3.40973e-21	7.76749e-11	4.73818e-12	0.0926691	0.00197027	0.0395418	0.00227283	0.0455014	1.66637		64.5523	24.6015	39.9508	1.85558	0.0550608	1.8241	0.340973	7.76749e-11	4.73818e-12	0.0926691	0.00197027	0.0395418	0.00227283	0.0455014	1.66637
54.2495	24.6015	29.6479	2.88351e-20	2.85379e-21	2.8326e-20	9.03319e-21	7.19428e-11	9.34289e-12	0.0720026	0.00696845	0.0366238	0.00469698	0.0353436	1.70361		54.2495	24.6015	29.6479	2.88351	0.285379	2.8326	0.903319	7.19428e-11	9.34289e-12	0.0720026	0.00696845	0.0366238	0.00469698	0.0353436	1.70361
54.3256	24.6029	29.7227	2.82388e-20	7.05967e-22	2.78864e-20	4.24361e-21	6.65999e-11	5.54281e-12	0.139959	0.00196215	0.0339058	0.00273553	0.0689421	1.58206		54.3256	24.6029	29.7227	2.82388	0.0705967	2.78864	0.424361	6.65999e-11	5.54281e-12	0.139959	0.00196215	0.0339058	0.00273553	0.0689421	1.58206
44.566	24.6015	19.9646	4.69458e-20	1.25887e-21	4.64186e-20	6.82878e-21	6.42157e-11	1.95371e-11	0.234451	0.00399678	0.0326901	0.00992324	0.115138	1.50162		44.566	24.6015	19.9646	4.69458	0.125887	4.64186	0.682878	6.42157e-11	1.95371e-11	0.234451	0.00399678	0.0326901	0.00992324	0.115138	1.50162
33.6247	24.601	9.02372	1.58579e-19	5.33034e-21	1.57662e-19	1.30443e-20	1.10138e-23	1.00951e-10	0.791948	0.0209738	5.60663e-15	0.05139	0.36632	1.15541		33.6247	24.601	9.02372	15.8579	0.533034	15.7662	1.30443	1.10138e-23	1.00951e-10	0.791948	0.0209738	5.60663e-15	0.05139	0.36632	1.15541
42.4262	24.6014	17.8248	8.97098e-20	1.96554e-21	8.96756e-20	9.58792e-21	2.24413e-12	1.97835e-11	0.448017	0.00321816	0.00114241	0.0100711	0.218512	1.35136		42.4262	24.6014	17.8248	8.97098	0.196554	8.96756	0.958792	2.24413e-12	1.97835e-11	0.448017	0.00321816	0.00114241	0.0100711	0.218512	1.35136
54.3046	24.6015	29.7031	4.50328e-20	1.01838e-21	4.45059e-20	6.68328e-21	6.66202e-11	1.50912e-11	0.224898	0.0020483	0.0339142	0.00765114	0.110453	1.51009		54.3046	24.6015	29.7031	4.50328	0.101838	4.45059	0.668328	6.66202e-11	1.50912e-11	0.224898	0.0020483	0.0339142	0.00765114	0.110453	1.51009
65.5413	24.6015	40.9398	2.84387e-20	7.45361e-22	2.80008e-20	5.28778e-21	8.09137e-11	9.63922e-12	0.142025	0.00228338	0.0411905	0.00483436	0.0697488	1.59694		65.5413	24.6015	40.9398	2.84387	0.0745361	2.80008	0.528778	8.09137e-11	9.63922e-12	0.142025	0.00228338	0.0411905	0.00483436	0.0697488	1.59694
75.0791	24.6013	50.4778	1.97019e-20	4.76633e-22	1.91878e-20	2.5787e-21	1.39989e-10	9.22582e-12	0.196785	0.00246423	0.0712633	0.00446529	0.0953879	1.59445		75.0791	24.6013	50.4778	1.97019	0.0476633	1.91878	0.25787	1.39989e-10	9.22582e-12	0.196785	0.00246423	0.0712633	0.00446529	0.0953879	1.59445
85.2327	24.6013	60.6314	1.55336e-20	3.48594e-22	1.50438e-20	1.82428e-21	1.56529e-10	5.4933e-12	0.155152	0.00134505	0.0796832	0.00227406	0.0749186	1.66443		85.2327	24.6013	60.6314	1.55336	0.0348594	1.50438	0.182428	1.56529e-10	5.4933e-12	0.155152	0.00134505	0.0796832	0.00227406	0.0749186	1.66443
94.8423	24.6014	70.2409	1.09391e-20	2.51063e-22	1.04919e-20	1.52115e-21	1.69238e-10	4.92859e-12	0.109261	0.00108327	0.0861532	0.00178848	0.0523258	1.77633		94.8423	24.6014	70.2409	1.09391	0.0251063	1.04919	0.152115	1.69238e-10	4.92859e-12	0.109261	0.00108327	0.0861532	0.00178848	0.0523258	1.77633
86.0811	24.6013	61.4798	1.19118e-20	2.5001e-22	1.11854e-20	8.34903e-22	3.18452e-10	8.20707e-12	0.237952	0.000826471	0.162113	0.0025479	0.111031	1.68002		86.0811	24.6013	61.4798	1.19118	0.025001	1.11854	0.0834903	3.18452e-10	8.20707e-12	0.237952	0.000826471	0.162113	0.0025479	0.111031	1.68002
76.79	24.6015	52.1885	1.11594e-20	2.6698e-22	1.08843e-20	1.54964e-21	1.13435e-10	3.62173e-12	0.111462	0.00133716	0.0577464	0.0014171	0.0542769	1.68718		76.79	24.6015	52.1885	1.11594	0.026698	1.08843	0.154964	1.13435e-10	3.62173e-12	0.111462	0.00133716	0.0577464	0.0014171	0.0542769	1.68718
64.8217	24.5994	40.2222	1.54896e-20	3.46775e-22	1.50414e-20	1.82671e-21	1.45055e-10	6.12757e-12	0.154706	0.00131957	0.0738366	0.00273027	0.0749038	1.65271		64.8217	24.5994	40.2222	1.54896	0.0346775	1.50414	0.182671	1.45055e-10	6.12757e-12	0.154706	0.00131957	0.0738366	0.00273027	0.0749038	1.65271
54.12	24.6014	29.5186	2.1846e-20	4.71787e-22	2.12541e-20	2.17261e-21	1.47734e-10	6.85611e-12	0.218202	0.00134395	0.0752066	0.00313402	0.105552	1.57842		54.12	24.6014	29.5186	2.1846	0.0471787	2.12541	0.217261	1.47734e-10	6.85611e-12	0.218202	0.00134395	0.0752066	0.00313402	0.105552	1.57842
44.5831	24.6018	19.9812	3.30868e-20	8.6417e-22	3.30232e-20	5.7473e-21	1.11869e-11	9.73168e-12	0.16524	0.00263199	0.00569497	0.00495278	0.0821821	1.5		44.5831	24.6018	19.9812	3.30868	0.086417	3.30232	0.57473	1.11869e-11	9.73168e-12	0.16524	0.00263199	0.00569497	0.00495278	0.0821821	1.5
33.9428	24.6014	9.34142	1.10866e-19	2.58904e-21	1.07149e-19	1.05371e-20	2.59188e-11	1.1429e-11	0.553674	0.00598639	0.0131944	0.00581188	0.258464	1.27093		33.9428	24.6014	9.34142	11.0866	0.258904	10.7149	1.05371	2.59188e-11	1.1429e-11	0.553674	0.00598639	0.0131944	0.00581188	0.258464	1.27093
42.7223	24.6033	18.119	6.66587e-20	1.51124e-21	6.60612e-20	8.18826e-21	5.23506e-11	2.58526e-11	0.332913	0.00307902	0.0266519	0.0131504	0.162764	1.43387		42.7223	24.6033	18.119	6.66587	0.151124	6.60612	0.818826	5.23506e-11	2.58526e-11	0.332913	0.00307902	0.0266519	0.0131504	0.162764	1.43387
53.7112	24.6017	29.1095	3.26935e-20	8.13209e-22	3.2181e-20	5.67528e-21	8.44814e-11	1.20807e-11	0.163275	0.00225206	0.0430071	0.0060869	0.0800995	1.57774		53.7112	24.6017	29.1095	3.26935	0.0813209	3.2181	0.567528	8.44814e-11	1.20807e-11	0.163275	0.00225206	0.0430071	0.0060869	0.0800995	1.57774
62.3454	24.6012	37.7442	2.39652e-20	5.20532e-22	2.31907e-20	2.2719e-21	1.77048e-10	8.19026e-12	0.239367	0.00157546	0.0901281	0.00374096	0.115047	1.57903		62.3454	24.6012	37.7442	2.39652	0.0520532	2.31907	0.22719	1.77048e-10	8.19026e-12	0.239367	0.00157546	0.0901281	0.00374096	0.115047	1.57903
75.1395	24.6014	50.5381	1.64775e-20	3.75117e-22	1.56859e-20	1.86312e-21	2.29713e-10	7.44455e-12	0.16458	0.00155972	0.116939	0.0029424	0.0780973	1.7241		75.1395	24.6014	50.5381	1.64775	0.0375117	1.56859	0.186312	2.29713e-10	7.44455e-12	0.16458	0.00155972	0.116939	0.0029424	0.0780973	1.7241
83.7447	24.6014	59.1433	1.15941e-20	2.71609e-22	1.15245e-20	1.59482e-21	3.27913e-11	2.94106e-12	0.115803	0.00127041	0.0166929	0.00145785	0.0574593	1.56121		83.7447	24.6014	59.1433	1.15941	0.0271609	1.15245	0.159482	3.27913e-11	2.94106e-12	0.115803	0.00127041	0.0166929	0.00145785	0.0574593	1.56121
94.4585	24.6014	69.8571	8.62445e-21	2.55082e-22	8.24067e-21	1.34728e-21	1.5899e-10	5.81327e-12	0.0861423	0.00181987	0.0809364	0.00245458	0.0411197	1.83657		94.4585	24.6014	69.8571	0.862445	0.0255082	0.824067	0.134728	1.5899e-10	5.81327e-12	0.0861423	0.00181987	0.0809364	0.00245458	0.0411197	1.83657
86.1254	24.6014	61.5241	8.75568e-21	2.58559e-22	8.37506e-21	1.3584e-21	1.57635e-10	4.9349e-12	0.087453	0.00184191	0.0802464	0.00190388	0.0417891	1.82886		86.1254	24.6014	61.5241	0.875568	0.0258559	0.837506	0.13584	1.57635e-10	4.9349e-12	0.087453	0.00184191	0.0802464	0.00190388	0.0417891	1.82886
75.9503	24.6014	51.3489	9.69617e-21	2.41186e-22	9.55038e-21	1.45104e-21	7.13666e-11	3.46025e-12	0.0968468	0.00133594	0.0363303	0.00159758	0.0476412	1.64729		75.9503	24.6014	51.3489	0.969617	0.0241186	0.955038	0.145104	7.13666e-11	3.46025e-12	0.0968468	0.00133594	0.0363303	0.00159758	0.0476412	1.64729
63.5894	24.6011	38.9883	1.35262e-20	3.24094e-22	1.3185e-20	1.70703e-21	1.2361e-10	5.26797e-12	0.135101	0.00163046	0.0629249	0.00235368	0.065704	1.65843		63.5894	24.6011	38.9883	1.35262	0.0324094	1.3185	0.170703	1.2361e-10	5.26797e-12	0.135101	0.00163046	0.0629249	0.00235368	0.065704	1.65843
53.4881	24.6015	28.8866	1.89093e-20	7.86397e-22	1.85879e-20	4.30383e-21	7.83601e-11	7.48957e-12	0.0944348	0.00340632	0.0398906	0.00372462	0.0463648	1.66409		53.4881	24.6015	28.8866	1.89093	0.0786397	1.85879	0.430383	7.83601e-11	7.48957e-12	0.0944348	0.00340632	0.0398906	0.00372462	0.0463648	1.66409
43.9584	24.6013	19.3572	3.2702e-20	9.48024e-22	3.19133e-20	5.6486e-21	1.25142e-10	8.52143e-12	0.163316	0.00331477	0.0637053	0.00413821	0.0794366	1.61979		43.9584	24.6013	19.3572	3.2702	0.0948024	3.19133	0.56486	1.25142e-10	8.52143e-12	0.163316	0.00331477	0.0637053	0.00413821	0.0794366	1.61979
33.4257	24.6015	8.82427	1.05338e-19	2.6941e-21	1.0608e-19	1.04826e-20	1.27286e-11	2.13175e-11	0.52607	0.00790264	0.00647969	0.0108512	0.256056	1.29748		33.4257	24.6015	8.82427	10.5338	0.26941	10.608	1.04826	1.27286e-11	2.13175e-11	0.52607	0.00790264	0.00647969	0.0108512	0.256056	1.29748
42.7999	24.6015	18.1984	5.95005e-20	1.36905e-21	5.8622e-20	7.69166e-21	8.52195e-11	2.39127e-11	0.29715	0.00298578	0.0433824	0.0121409	0.144838	1.47376		42.7999	24.6015	18.1984	5.95005	0.136905	5.8622	0.769166	8.52195e-11	2.39127e-11	0.29715	0.00298578	0.0433824	0.0121409	0.144838	1.47376
RA12																RA12			0	0	0	0
35.9162	24.7386	11.1776	3.24044e-20	1.68917e-21	1.87215e-20	4.10923e-21	1.86712e-09	1.26275e-10	0.211446	0.00987185	0.943454	0.0600241	0.0609673	2.71166		35.9162	24.7386	11.1776	3.24044	0.168917	1.87215	0.410923	1.86712e-09	1.26275e-10	0.211446	0.00987185	0.943454	0.0600241	0.0609673	2.71166
96.129	24.7372	71.3917	1.56482e-20	1.01054e-21	7.61984e-21	1.53585e-21	3.55989e-09	3.4472e-10	0.408372	0.0246138	1.79871	0.169219	0.0989399	2.59181		96.129	24.7372	71.3917	1.56482	0.101054	0.761984	0.153585	3.55989e-09	3.4472e-10	0.408372	0.0246138	1.79871	0.169219	0.0989399	2.59181
35.9021	24.7359	11.1663	3.00557e-20	1.65726e-21	1.60867e-20	3.82074e-21	1.98324e-09	1.29685e-10	0.195877	0.00979935	1.00202	0.0613583	0.0523478	2.86214		35.9021	24.7359	11.1663	3.00557	0.165726	1.60867	0.382074	1.98324e-09	1.29685e-10	0.195877	0.00979935	1.00202	0.0613583	0.0523478	2.86214
95.9453	24.7401	71.2052	1.60503e-20	1.15528e-21	7.45161e-21	1.5186e-21	3.84594e-09	3.66427e-10	0.418441	0.0285135	1.94347	0.179719	0.0966788	2.6381		95.9453	24.7401	71.2052	1.60503	0.115528	0.745161	0.15186	3.84594e-09	3.66427e-10	0.418441	0.0285135	1.94347	0.179719	0.0966788	2.6381
65.7271	24.737	40.9901	1.66029e-20	7.29137e-22	6.73929e-21	1.45131e-21	2.97937e-09	1.44988e-10	0.216586	0.00807794	1.50537	0.0646074	0.0439148	3.20023		65.7271	24.737	40.9901	1.66029	0.0729137	0.673929	0.145131	2.97937e-09	1.44988e-10	0.216586	0.00807794	1.50537	0.0646074	0.0439148	3.20023
95.9356	24.7368	71.1987	1.57656e-20	1.21502e-21	7.17086e-21	1.48653e-21	3.91625e-09	3.86152e-10	0.41139	0.0302359	1.97874	0.189755	0.0931516	2.67568		95.9356	24.7368	71.1987	1.57656	0.121502	0.717086	0.148653	3.91625e-09	3.86152e-10	0.41139	0.0302359	1.97874	0.189755	0.0931516	2.67568
35.9017	24.736	11.1657	2.69198e-20	1.93072e-21	1.33712e-20	3.47387e-21	2.02109e-09	1.57888e-10	0.175483	0.01191	1.02115	0.0762555	0.0435403	3.01969		35.9017	24.736	11.1657	2.69198	0.193072	1.33712	0.347387	2.02109e-09	1.57888e-10	0.175483	0.01191	1.02115	0.0762555	0.0435403	3.01969
95.9532	24.738	71.2152	1.53566e-20	9.96208e-22	6.9959e-21	1.4701e-21	3.85252e-09	3.55655e-10	0.400467	0.0242629	1.94663	0.174071	0.0908415	2.69125		95.9532	24.738	71.2152	1.53566	0.0996208	0.69959	0.14701	3.85252e-09	3.55655e-10	0.400467	0.0242629	1.94663	0.174071	0.0908415	2.69125
96.3277	39.8564	56.4714	1.94498e-20	1.03678e-21	1.02102e-20	1.95381e-21	2.38643e-09	1.95644e-10	0.641986	0.0308053	1.94276	0.152961	0.166163	2.19129		96.3277	39.8564	56.4714	1.94498	0.103678	1.02102	0.195381	2.38643e-09	1.95644e-10	0.641986	0.0308053	1.94276	0.152961	0.166163	2.19129
96.3387	65.3054	31.0333	2.69988e-20	1.00137e-21	1.54689e-20	3.49308e-21	1.17303e-09	6.54013e-11	0.535864	0.0154681	1.5647	0.0796232	0.151733	2.19992		96.3387	65.3054	31.0333	2.69988	0.100137	1.54689	0.349308	1.17303e-09	6.54013e-11	0.535864	0.0154681	1.5647	0.0796232	0.151733	2.19992
96.3358	85.3504	10.9854	5.60227e-20	1.99799e-21	3.2968e-20	7.45549e-21	8.87481e-10	4.80127e-11	0.601574	0.016222	1.54717	0.075935	0.174297	2.08979		96.3358	85.3504	10.9854	5.60227	0.199799	3.2968	0.745549	8.87481e-10	4.80127e-11	0.601574	0.016222	1.54717	0.075935	0.174297	2.08979
96.0941	24.7354	71.3588	1.44982e-20	1.15016e-21	6.34699e-21	1.40401e-21	3.92484e-09	3.99614e-10	0.378127	0.0286877	1.98296	0.196707	0.082486	2.77969		96.0941	24.7354	71.3588	1.44982	0.115016	0.634699	0.140401	3.92484e-09	3.99614e-10	0.378127	0.0286877	1.98296	0.196707	0.082486	2.77969
65.7336	24.7389	40.9946	1.68004e-20	7.08551e-22	8.55063e-21	1.62813e-21	3.4584e-09	1.90081e-10	0.438123	0.0154348	1.74755	0.0872829	0.110806	2.48803		65.7336	24.7389	40.9946	1.68004	0.0708551	0.855063	0.162813	3.4584e-09	1.90081e-10	0.438123	0.0154348	1.74755	0.0872829	0.110806	2.48803
96.2096	24.7398	71.4698	1.41029e-20	1.20046e-21	6.35949e-21	1.40583e-21	3.72309e-09	3.9162e-10	0.367665	0.0301128	1.88137	0.193131	0.0826133	2.75941		96.2096	24.7398	71.4698	1.41029	0.120046	0.635949	0.140583	3.72309e-09	3.9162e-10	0.367665	0.0301128	1.88137	0.193131	0.0826133	2.75941
96.3355	55.4008	40.9347	2.7424e-20	1.58419e-21	1.20257e-20	2.93241e-21	2.04953e-09	1.42243e-10	0.515315	0.0272481	2.31922	0.152027	0.112272	2.56786		96.3355	55.4008	40.9347	2.7424	0.158419	1.20257	0.293241	2.04953e-09	1.42243e-10	0.515315	0.0272481	2.31922	0.152027	0.112272	2.56786
86.0388	55.4001	30.6387	2.84702e-20	1.9453e-21	1.41545e-20	4.24995e-21	1.74885e-09	1.77222e-10	0.535274	0.0343893	1.97896	0.195398	0.131898	2.38463		86.0388	55.4001	30.6387	2.84702	0.19453	1.41545	0.424995	1.74885e-09	1.77222e-10	0.535274	0.0343893	1.97896	0.195398	0.131898	2.38463
75.6237	55.3988	20.2248	2.798e-20	2.19765e-21	1.30806e-20	5.18178e-21	1.2934e-09	1.31672e-10	0.262641	0.0197033	1.46355	0.145209	0.0612766	2.90965		75.6237	55.3988	20.2248	2.798	0.219765	1.30806	0.518178	1.2934e-09	1.31672e-10	0.262641	0.0197033	1.46355	0.145209	0.0612766	2.90965
66.3994	55.4021	10.9973	3.98208e-20	2.55435e-21	2.38312e-20	7.01255e-21	1.09566e-09	1.04729e-10	0.374116	0.0223646	1.23987	0.115092	0.111252	2.36022		66.3994	55.4021	10.9973	3.98208	0.255435	2.38312	0.701255	1.09566e-09	1.04729e-10	0.374116	0.0223646	1.23987	0.115092	0.111252	2.36022
35.9005	24.7376	11.1629	2.37229e-20	3.30155e-21	1.16346e-20	4.10473e-21	1.86559e-09	3.10936e-10	0.154758	0.0212368	0.942643	0.155614	0.0379222	3.08954		35.9005	24.7376	11.1629	2.37229	0.330155	1.16346	0.410473	1.86559e-09	3.10936e-10	0.154758	0.0212368	0.942643	0.155614	0.0379222	3.08954
RA13																RA13			0	0	0	0
35.5928	25.1919	10.401	6.25774e-19	3.36336e-20	5.8513e-19	1.05062e-19	4.40788e-10	2.52116e-10	0.69892	0.034667	0.199864	0.114243	0.310601	1.34726		35.5928	25.1919	10.401	62.5774	3.36336	58.513	10.5062	4.40788e-10	2.52116e-10	0.69892	0.034667	0.199864	0.114243	0.310601	1.34726
85.6234	25.1923	60.4311	1.40971e-21	3.10456e-23	8.6439e-22	8.03697e-23	1.22886e-09	2.71173e-11	0.118088	0.000887415	0.557205	0.00466105	0.0361802	2.83632		85.6234	25.1923	60.4311	0.140971	0.00310456	0.086439	0.00803697	1.22886e-09	2.71173e-11	0.118088	0.000887415	0.557205	0.00466105	0.0361802	2.83632
37.5668	25.1925	12.3743	6.00933e-21	1.36543e-22	3.64521e-21	4.54079e-22	1.38318e-09	3.16548e-11	0.134237	0.00125752	0.627183	0.0064806	0.0406798	2.81323		37.5668	25.1925	12.3743	0.600933	0.0136543	0.364521	0.0454079	1.38318e-09	3.16548e-11	0.134237	0.00125752	0.627183	0.0064806	0.0406798	2.81323
37.5268	25.1924	12.3343	5.31441e-21	1.29754e-22	3.7273e-21	4.59205e-22	9.63715e-10	2.41563e-11	0.118714	0.00153685	0.436982	0.00635224	0.0415944	2.59449		37.5268	25.1924	12.3343	0.531441	0.0129754	0.37273	0.0459205	9.63715e-10	2.41563e-11	0.118714	0.00153685	0.436982	0.00635224	0.0415944	2.59449
52.5566	25.1925	27.3641	2.48064e-21	8.27278e-23	1.20698e-21	2.608e-22	8.71652e-10	2.99036e-11	0.0554128	0.00144887	0.395238	0.0108958	0.0134796	3.38363		52.5566	25.1925	27.3641	0.248064	0.00827278	0.120698	0.02608	8.71652e-10	2.99036e-11	0.0554128	0.00144887	0.395238	0.0108958	0.0134796	3.38363
37.7965	26.2872	11.5093	7.5407e-21	1.70903e-22	4.59639e-21	5.13885e-22	1.58546e-09	3.67802e-11	0.172381	0.00159014	0.750145	0.00827233	0.0524647	2.7136		37.7965	26.2872	11.5093	0.75407	0.0170903	0.459639	0.0513885	1.58546e-09	3.67802e-11	0.172381	0.00159014	0.750145	0.00827233	0.0524647	2.7136
79.7008	25.1925	54.5083	1.85026e-21	3.86587e-23	1.28852e-21	8.59024e-23	1.24631e-09	2.57945e-11	0.165147	0.000467757	0.565124	0.00190559	0.0574093	2.49909		79.7008	25.1925	54.5083	0.185026	0.00386587	0.128852	0.00859024	1.24631e-09	2.57945e-11	0.165147	0.000467757	0.565124	0.00190559	0.0574093	2.49909
38.9024	25.1924	13.71	6.19443e-21	1.57181e-22	3.49348e-21	4.4449e-22	1.5823e-09	4.16009e-11	0.138372	0.00203054	0.717469	0.0118818	0.0389892	2.92038		38.9024	25.1924	13.71	0.619443	0.0157181	0.349348	0.044449	1.5823e-09	4.16009e-11	0.138372	0.00203054	0.717469	0.0118818	0.0389892	2.92038
53.3645	25.1924	28.1721	3.87567e-21	8.25623e-23	2.31815e-21	2.13198e-22	1.71206e-09	3.63416e-11	0.17315	0.00087063	0.776306	0.00449982	0.0517137	2.7425		53.3645	25.1924	28.1721	0.387567	0.00825623	0.231815	0.0213198	1.71206e-09	3.63416e-11	0.17315	0.00087063	0.776306	0.00449982	0.0517137	2.7425
RA14																RA14			0	0	0	0
35.7175	25.1964	10.5211	2.13698e-19	6.84755e-21	2.07698e-19	3.83766e-20	1.97517e-10	5.84995e-11	0.33166	0.00811193	0.0820502	0.0242433	0.159121	1.49232		35.7175	25.1964	10.5211	21.3698	0.684755	20.7698	3.83766	1.97517e-10	5.84995e-11	0.33166	0.00811193	0.0820502	0.0242433	0.159121	1.49232
37.6108	25.1964	12.4143	6.04353e-20	5.77148e-21	5.61047e-20	1.97672e-20	2.916e-10	3.76251e-11	0.0937959	0.00874438	0.121133	0.0154328	0.0434962	1.94404		37.6108	25.1964	12.4143	6.04353	0.577148	5.61047	1.97672	2.916e-10	3.76251e-11	0.0937959	0.00874438	0.121133	0.0154328	0.0434962	1.94404
37.5999	25.1957	12.4042	6.80999e-20	1.7151e-21	6.40647e-20	1.05829e-20	3.67576e-10	1.90136e-11	0.211379	0.00303202	0.15269	0.00725666	0.098939	1.7057		37.5999	25.1957	12.4042	6.80999	0.17151	6.40647	1.05829	3.67576e-10	1.90136e-11	0.211379	0.00303202	0.15269	0.00725666	0.098939	1.7057
53.7057	25.1953	28.5104	1.6694e-20	5.26431e-22	1.42122e-20	2.4624e-21	5.37146e-10	1.85092e-11	0.103634	0.00246524	0.223124	0.006193	0.0440708	2.19758		53.7057	25.1953	28.5104	1.6694	0.0526431	1.42122	0.24624	5.37146e-10	1.85092e-11	0.103634	0.00246524	0.223124	0.006193	0.0440708	2.19758
36.2748	25.1948	11.08	2.89581e-20	7.61038e-22	2.56809e-20	3.68978e-21	6.04357e-10	1.72584e-11	0.179766	0.0029105	0.251038	0.00501129	0.0794589	1.93257		36.2748	25.1948	11.08	2.89581	0.0761038	2.56809	0.368978	6.04357e-10	1.72584e-11	0.179766	0.0029105	0.251038	0.00501129	0.0794589	1.93257
53.4033	25.1927	28.2106	1.75585e-20	3.77305e-22	1.52439e-20	1.5027e-21	7.55158e-10	1.81012e-11	0.217989	0.00125635	0.313652	0.00393722	0.0942061	1.92687		53.4033	25.1927	28.2106	1.75585	0.0377305	1.52439	0.15027	7.55158e-10	1.81012e-11	0.217989	0.00125635	0.313652	0.00393722	0.0942061	1.92687
37.1801	25.1929	11.9871	2.43323e-20	6.3265e-22	2.14849e-20	3.36627e-21	5.66977e-10	1.78577e-11	0.151044	0.00237616	0.235494	0.00564705	0.0665363	1.99637		37.1801	25.1929	11.9871	2.43323	0.063265	2.14849	0.336627	5.66977e-10	1.78577e-11	0.151044	0.00237616	0.235494	0.00564705	0.0665363	1.99637
53.1004	25.1927	27.9077	1.67524e-20	3.6116e-22	1.46519e-20	1.47278e-21	7.07378e-10	1.6436e-11	0.207981	0.00125205	0.293807	0.0032568	0.0905781	1.92374		53.1004	25.1927	27.9077	1.67524	0.036116	1.46519	0.147278	7.07378e-10	1.6436e-11	0.207981	0.00125205	0.293807	0.0032568	0.0905781	1.92374
54.6912	35.145	19.5461	2.21658e-20	5.48745e-22	1.91015e-20	3.37483e-21	4.86372e-10	1.46876e-11	0.162887	0.00220668	0.281818	0.00628898	0.070012	2.04135		54.6912	35.145	19.5461	2.21658	0.0548745	1.91015	0.337483	4.86372e-10	1.46876e-11	0.162887	0.00220668	0.281818	0.00628898	0.070012	2.04135
54.7463	44.8987	9.84759	3.94396e-20	9.12247e-22	3.52414e-20	4.86787e-21	3.99433e-10	1.53784e-11	0.322414	0.00329456	0.295674	0.0096726	0.142576	1.71797		54.7463	44.8987	9.84759	3.94396	0.0912247	3.52414	0.486787	3.99433e-10	1.53784e-11	0.322414	0.00329456	0.295674	0.0096726	0.142576	1.71797
54.7073	45.0977	9.60962	4.09423e-20	8.88528e-22	3.60584e-20	4.93004e-21	4.48398e-10	1.24662e-11	0.335297	0.00213008	0.33339	0.00633323	0.146067	1.73692		54.7073	45.0977	9.60962	4.09423	0.0888528	3.60584	0.493004	4.48398e-10	1.24662e-11	0.335297	0.00213008	0.33339	0.00633323	0.146067	1.73692
54.9462	25.1925	29.7536	1.42999e-20	3.56325e-22	1.19888e-20	1.47933e-21	8.12544e-10	2.21601e-11	0.177532	0.00246235	0.337485	0.00610085	0.0742153	2.08379		54.9462	25.1925	29.7536	1.42999	0.0356325	1.19888	0.147933	8.12544e-10	2.21601e-11	0.177532	0.00246235	0.337485	0.00610085	0.0742153	2.08379
73.7518	25.1925	48.5593	4.65078e-21	1.14088e-22	3.46253e-21	4.19768e-22	8.98239e-10	2.21608e-11	0.115479	0.00151989	0.373078	0.00516523	0.0429475	2.48378		73.7518	25.1925	48.5593	0.465078	0.0114088	0.346253	0.0419768	8.98239e-10	2.21608e-11	0.115479	0.00151989	0.373078	0.00516523	0.0429475	2.48378
36.9137	25.1927	11.721	9.42732e-21	2.3336e-22	7.05687e-21	1.0189e-21	8.95098e-10	2.2855e-11	0.11704	0.00158849	0.371776	0.00569877	0.0437637	2.46874		36.9137	25.1927	11.721	0.942732	0.023336	0.705687	0.10189	8.95098e-10	2.2855e-11	0.11704	0.00158849	0.371776	0.00569877	0.0437637	2.46874
75.0885	25.1925	49.8959	4.04421e-21	8.4576e-23	3.61248e-21	2.53181e-22	6.05296e-10	1.28806e-11	0.200835	0.000596026	0.251406	0.00150504	0.089339	1.87798		75.0885	25.1925	49.8959	0.404421	0.0084576	0.361248	0.0253181	6.05296e-10	1.28806e-11	0.200835	0.000596026	0.251406	0.00150504	0.089339	1.87798
36.4535	25.1928	11.2607	8.43657e-21	2.26457e-22	6.41909e-21	9.71642e-22	7.88441e-10	2.28309e-11	0.10474	0.0017897	0.327477	0.00672336	0.039815	2.46416		36.4535	25.1928	11.2607	0.843657	0.0226457	0.641909	0.0971642	7.88441e-10	2.28309e-11	0.10474	0.0017897	0.327477	0.00672336	0.039815	2.46416
73.7557	24.9933	48.7624	4.34988e-21	9.21094e-23	3.59729e-21	2.52323e-22	9.63493e-10	2.07926e-11	0.215075	0.000958338	0.397016	0.00276889	0.0885822	2.04875		73.7557	24.9933	48.7624	0.434988	0.00921094	0.359729	0.0252323	9.63493e-10	2.07926e-11	0.215075	0.000958338	0.397016	0.00276889	0.0885822	2.04875
38.1595	24.9937	13.1658	7.91665e-21	2.05584e-22	5.77149e-21	9.19832e-22	8.36771e-10	2.15982e-11	0.097858	0.00153432	0.344804	0.00544258	0.0356482	2.57063		38.1595	24.9937	13.1658	0.791665	0.0205584	0.577149	0.0919832	8.36771e-10	2.15982e-11	0.097858	0.00153432	0.344804	0.00544258	0.0356482	2.57063
74.4112	24.9934	49.4178	4.11273e-21	8.56733e-23	3.43313e-21	2.46403e-22	8.98677e-10	1.87328e-11	0.203349	0.000472839	0.370309	0.0015461	0.0845696	2.04737		74.4112	24.9934	49.4178	0.411273	0.00856733	0.343313	0.0246403	8.98677e-10	1.87328e-11	0.203349	0.000472839	0.370309	0.0015461	0.0845696	2.04737
74.4134	39.9716	34.4418	5.96347e-21	1.27443e-22	4.81926e-21	5.42428e-22	6.09727e-10	1.34961e-11	0.185727	0.000960896	0.401812	0.00352619	0.0748352	2.1545		74.4134	39.9716	34.4418	0.596347	0.0127443	0.481926	0.0542428	6.09727e-10	1.34961e-11	0.185727	0.000960896	0.401812	0.00352619	0.0748352	2.1545
73.8422	59.6282	14.214	1.30241e-20	2.74402e-22	1.11134e-20	9.22448e-22	4.51704e-10	1.09717e-11	0.473247	0.001591	0.44406	0.00595063	0.197917	1.66251		73.8422	59.6282	14.214	1.30241	0.0274402	1.11134	0.0922448	4.51704e-10	1.09717e-11	0.473247	0.001591	0.44406	0.00595063	0.197917	1.66251
73.9176	49.7757	24.1419	8.73391e-21	1.83073e-22	7.45221e-21	7.14347e-22	4.77549e-10	1.00729e-11	0.297401	0.000847295	0.391896	0.00226759	0.12587	1.8537		73.9176	49.7757	24.1419	0.873391	0.0183073	0.745221	0.0714347	4.77549e-10	1.00729e-11	0.297401	0.000847295	0.391896	0.00226759	0.12587	1.8537
74.0344	39.9728	34.0616	6.12759e-21	1.3162e-22	5.0386e-21	5.5514e-22	5.78943e-10	1.25499e-11	0.190841	0.00107021	0.381537	0.00287994	0.0782218	2.10518		74.0344	39.9728	34.0616	0.612759	0.013162	0.50386	0.055514	5.78943e-10	1.25499e-11	0.190841	0.00107021	0.381537	0.00287994	0.0782218	2.10518
74.2573	49.7758	24.4815	8.22496e-21	1.73798e-22	7.02485e-21	6.93162e-22	4.64755e-10	1.03872e-11	0.280071	0.00109348	0.381398	0.00357945	0.118756	1.8748		74.2573	49.7758	24.4815	0.822496	0.0173798	0.702485	0.0693162	4.64755e-10	1.03872e-11	0.280071	0.00109348	0.381398	0.00357945	0.118756	1.8748
74.4159	59.629	14.787	1.06905e-20	2.38474e-22	8.96743e-21	1.39411e-21	3.59771e-10	8.46776e-12	0.194228	0.00156605	0.353686	0.00423769	0.0811922	2.05195		74.4159	59.629	14.787	1.06905	0.0238474	0.896743	0.139411	3.59771e-10	8.46776e-12	0.194228	0.00156605	0.353686	0.00423769	0.0811922	2.05195
74.4185	64.804	9.61457	1.40445e-20	3.0472e-22	1.22992e-20	1.67653e-21	3.00073e-10	7.18156e-12	0.262264	0.00160562	0.3206	0.00409025	0.114087	1.84026		74.4185	64.804	9.61457	1.40445	0.030472	1.22992	0.167653	3.00073e-10	7.18156e-12	0.262264	0.00160562	0.3206	0.00409025	0.114087	1.84026
74.8796	64.804	10.0756	1.4854e-20	3.19237e-22	1.25623e-20	1.69415e-21	3.74831e-10	8.46834e-12	0.277381	0.00148392	0.400473	0.00401297	0.116494	1.90075		74.8796	64.804	10.0756	1.4854	0.0319237	1.25623	0.169415	3.74831e-10	8.46834e-12	0.277381	0.00148392	0.400473	0.00401297	0.116494	1.90075
74.7656	25.8905	48.8751	3.59691e-21	7.77297e-23	2.87229e-21	2.81988e-22	8.05362e-10	1.75635e-11	0.135977	0.000842967	0.343769	0.00263776	0.0542118	2.28396		74.7656	25.8905	48.8751	0.359691	0.00777297	0.287229	0.0281988	8.05362e-10	1.75635e-11	0.135977	0.000842967	0.343769	0.00263776	0.0542118	2.28396
94.6739	24.9948	69.6791	2.06577e-21	4.7669e-23	1.4771e-21	1.61118e-22	9.0423e-10	2.13421e-11	0.102142	0.00104143	0.372618	0.00440898	0.0364934	2.59849		94.6739	24.9948	69.6791	0.206577	0.0047669	0.14771	0.0161118	9.0423e-10	2.13421e-11	0.102142	0.00104143	0.372618	0.00440898	0.0364934	2.59849
76.3466	24.9949	51.3517	2.04888e-21	4.66984e-23	1.53782e-21	2.04763e-22	6.35175e-10	1.46719e-11	0.0759808	0.000724616	0.261746	0.00282504	0.0285028	2.56701		76.3466	24.9949	51.3517	0.204888	0.00466984	0.153782	0.0204763	6.35175e-10	1.46719e-11	0.0759808	0.000724616	0.261746	0.00282504	0.0285028	2.56701
38.956	24.9948	13.9612	5.81323e-21	1.23131e-22	4.71077e-21	3.6002e-22	1.04775e-09	2.21971e-11	0.215578	0.000966684	0.431762	0.00243271	0.0870159	2.09356		38.956	24.9948	13.9612	0.581323	0.0123131	0.471077	0.036002	1.04775e-09	2.21971e-11	0.215578	0.000966684	0.431762	0.00243271	0.0870159	2.09356
94.8244	24.9947	69.8297	2.01104e-21	4.45751e-23	1.40419e-21	1.57061e-22	9.30706e-10	2.06592e-11	0.0994362	0.000787772	0.383527	0.00333576	0.0346944	2.65171		94.8244	24.9947	69.8297	0.201104	0.00445751	0.140419	0.0157061	9.30706e-10	2.06592e-11	0.0994362	0.000787772	0.383527	0.00333576	0.0346944	2.65171
36.9086	24.995	11.9136	5.05147e-21	1.12843e-22	3.98757e-21	4.50505e-22	8.15509e-10	1.86354e-11	0.124887	0.0010485	0.336061	0.00344529	0.0492323	2.33515		36.9086	24.995	11.9136	0.505147	0.0112843	0.398757	0.0450505	8.15509e-10	1.86354e-11	0.124887	0.0010485	0.336061	0.00344529	0.0492323	2.33515
55.9555	25.1939	30.7616	3.79025e-21	8.20628e-23	2.90397e-21	2.82282e-22	9.63597e-10	2.05913e-11	0.141172	0.000895393	0.400246	0.00252018	0.0540018	2.36373		55.9555	25.1939	30.7616	0.379025	0.00820628	0.290397	0.0282282	9.63597e-10	2.05913e-11	0.141172	0.000895393	0.400246	0.00252018	0.0540018	2.36373
75.6403	25.1939	50.4464	2.53231e-21	5.94577e-23	1.78383e-21	2.20909e-22	8.68642e-10	2.06142e-11	0.0943186	0.00104499	0.360804	0.00436248	0.033202	2.64794		75.6403	25.1939	50.4464	0.253231	0.00594577	0.178383	0.0220909	8.68642e-10	2.06142e-11	0.0943186	0.00104499	0.360804	0.00436248	0.033202	2.64794
94.8254	25.1939	69.6315	1.79957e-21	4.12358e-23	1.25811e-21	1.48812e-22	8.4418e-10	1.94534e-11	0.0893691	0.000878015	0.350643	0.00374445	0.0312245	2.67562		94.8254	25.1939	69.6315	0.179957	0.00412358	0.125811	0.0148812	8.4418e-10	1.94534e-11	0.0893691	0.000878015	0.350643	0.00374445	0.0312245	2.67562
35.7532	25.1941	10.5592	5.23986e-21	1.20813e-22	4.11711e-21	4.58365e-22	8.44974e-10	1.96932e-11	0.13011	0.00132086	0.350976	0.00394268	0.0510489	2.3337		35.7532	25.1941	10.5592	0.523986	0.0120813	0.411711	0.0458365	8.44974e-10	1.96932e-11	0.13011	0.00132086	0.350976	0.00394268	0.0510489	2.3337
56.0058	25.1938	30.812	3.62541e-21	7.7555e-23	2.89024e-21	2.263e-22	9.97109e-10	2.13382e-11	0.180043	0.000970889	0.414163	0.00265093	0.0715824	2.19587		56.0058	25.1938	30.812	0.362541	0.0077555	0.289024	0.02263	9.97109e-10	2.13382e-11	0.180043	0.000970889	0.414163	0.00265093	0.0715824	2.19587
94.8269	25.1938	69.6331	1.69252e-21	3.85437e-23	1.12194e-21	1.40492e-22	8.88123e-10	2.03346e-11	0.0840528	0.000797695	0.368895	0.00382013	0.0278478	2.78996		94.8269	25.1938	69.6331	0.169252	0.00385437	0.112194	0.0140492	8.88123e-10	2.03346e-11	0.0840528	0.000797695	0.368895	0.00382013	0.0278478	2.78996
38.2367	25.1946	13.0421	6.27076e-21	4.01833e-22	2.15841e-21	5.63078e-22	1.83296e-09	1.24578e-10	0.0778548	0.00472147	0.761371	0.0493561	0.0133977	3.80409		38.2367	25.1946	13.0421	0.627076	0.0401833	0.215841	0.0563078	1.83296e-09	1.24578e-10	0.0778548	0.00472147	0.761371	0.0493561	0.0133977	3.80409
93.5177	25.1938	68.3239	1.72786e-21	3.98788e-23	1.1489e-21	1.42174e-22	8.98691e-10	2.09529e-11	0.0858075	0.000875671	0.373284	0.00419994	0.0285162	2.77955		93.5177	25.1938	68.3239	0.172786	0.00398788	0.11489	0.0142174	8.98691e-10	2.09529e-11	0.0858075	0.000875671	0.373284	0.00419994	0.0285162	2.77955
93.5314	43.1078	50.4236	2.44822e-21	5.2281e-23	1.8282e-21	2.48886e-22	5.29889e-10	1.12361e-11	0.118096	0.000598379	0.376596	0.00229864	0.0440509	2.47124		93.5314	43.1078	50.4236	0.244822	0.0052281	0.18282	0.0248886	5.29889e-10	1.12361e-11	0.118096	0.000598379	0.376596	0.00229864	0.0440509	2.47124
93.5403	60.0269	33.5134	2.93506e-21	8.13214e-23	2.07962e-21	4.9169e-22	3.1486e-10	8.97344e-12	0.0801675	0.00146736	0.311602	0.00624648	0.0283896	2.67401		93.5403	60.0269	33.5134	0.293506	0.00813214	0.207962	0.049169	3.1486e-10	8.97344e-12	0.0801675	0.00146736	0.311602	0.00624648	0.0283896	2.67401
93.5503	79.9332	13.617	6.23858e-21	1.41839e-22	4.81733e-21	1.11636e-21	2.70893e-10	6.51295e-12	0.124024	0.00112185	0.356994	0.00463964	0.0478301	2.38603		93.5503	79.9332	13.617	0.623858	0.0141839	0.481733	0.111636	2.70893e-10	6.51295e-12	0.124024	0.00112185	0.356994	0.00463964	0.0478301	2.38603
94.0044	82.9188	11.0856	6.64324e-21	1.93351e-22	4.75047e-21	1.39771e-21	2.68064e-10	8.29051e-12	0.100049	0.00202995	0.36646	0.00857468	0.0357487	2.60371		94.0044	82.9188	11.0856	0.664324	0.0193351	0.475047	0.139771	2.68064e-10	8.29051e-12	0.100049	0.00202995	0.36646	0.00857468	0.0357487	2.60371
93.9182	65.0031	28.9151	4.46534e-21	1.17308e-22	3.43017e-21	6.46828e-22	3.40364e-10	9.09174e-12	0.1252	0.00200658	0.364764	0.00635497	0.0480324	2.39457		93.9182	65.0031	28.9151	0.446534	0.0117308	0.343017	0.0646828	3.40364e-10	9.09174e-12	0.1252	0.00200658	0.364764	0.00635497	0.0480324	2.39457
94.1921	44.103	50.089	2.59661e-21	5.69702e-23	1.97997e-21	2.60488e-22	5.15685e-10	1.13517e-11	0.126437	0.000901976	0.374963	0.00318917	0.0481497	2.40754		94.1921	44.103	50.089	0.259661	0.00569702	0.197997	0.0260488	5.15685e-10	1.13517e-11	0.126437	0.000901976	0.374963	0.00318917	0.0481497	2.40754
94.3608	25.1938	69.167	1.4331e-21	3.51695e-23	9.55533e-22	1.29616e-22	7.62247e-10	1.89787e-11	0.0711696	0.000938021	0.316611	0.00451027	0.0237198	2.81483		94.3608	25.1938	69.167	0.14331	0.00351695	0.0955533	0.0129616	7.62247e-10	1.89787e-11	0.0711696	0.000938021	0.316611	0.00451027	0.0237198	2.81483
